# Supplementary material for: Coordinated activities of Myosin Vb isoforms and mTOR signaling regulate epithelial cell morphology during development
Source: Oxford University Press journal article supplement (doi:10.1242/dev.199363), 2022-03-15
Supplement: dev199363supp.pdf [file dev199363supp.pdf]

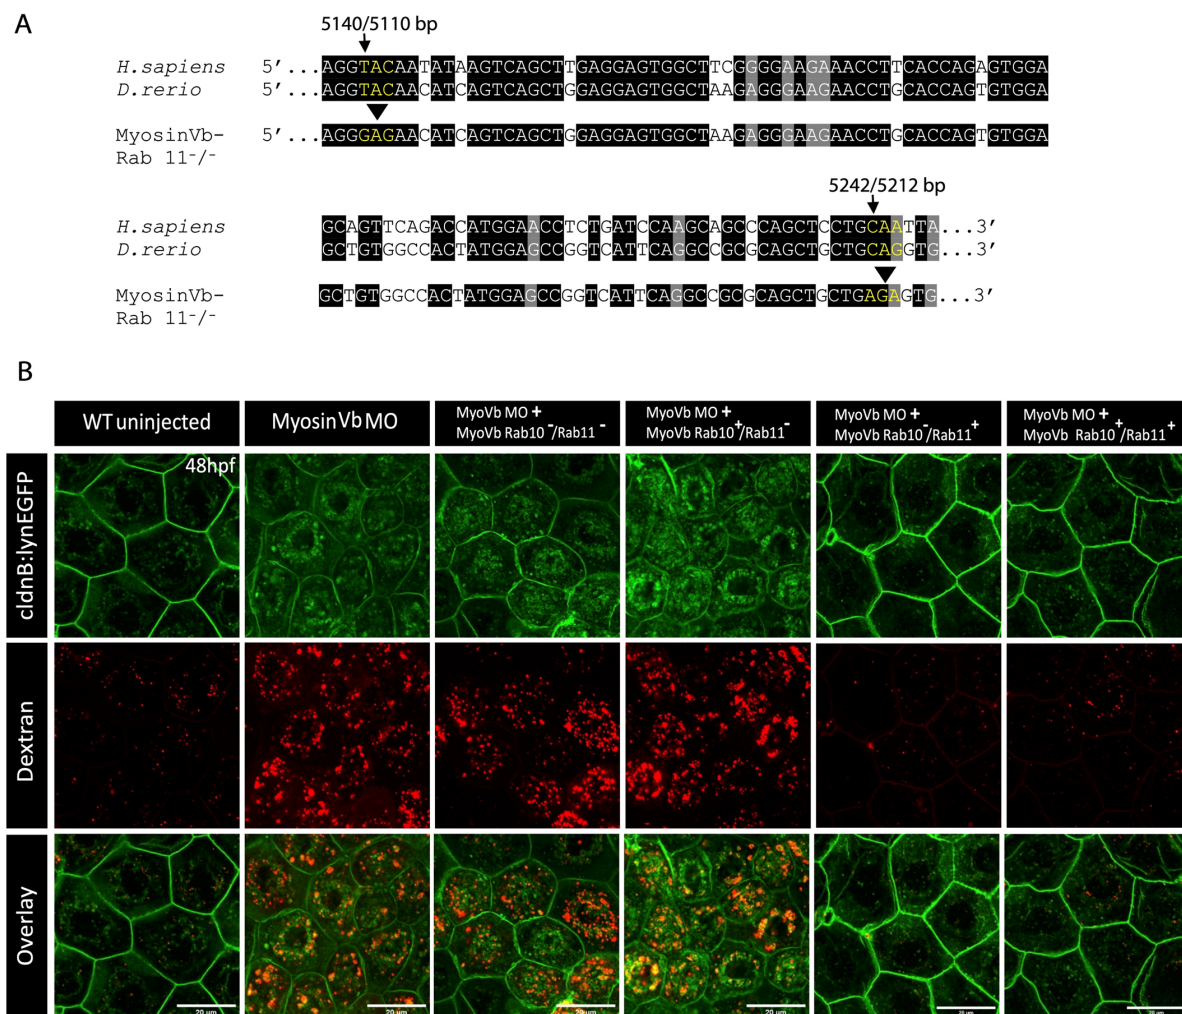

**Fig. S1.** Myosin Vb-Rab11 interaction is essential to prevent the accumulation of apically derived endosomes arising from fluid phase endocytosis

(A) Homology analysis for Human vs Zebrafish Myosin Vb ExonD CDS from 5137/5107

(Human/Zebrafish) to 5247/5217 bases using Clustal omega multiple sequence alignment

tool. Mutations introduced to abolish Rab11 binding of Myosin Vb (MyoVb-Rab11<sup>-/-</sup>) are

shown in yellow. (B) Representative confocal images of the Lyn-EGFP marked peridermal

cells in 48hpf embryos of the given genetic combinations incubated in Rhodamine-Dextran

(10 kDa).

Scale Bars in B = 20μ.

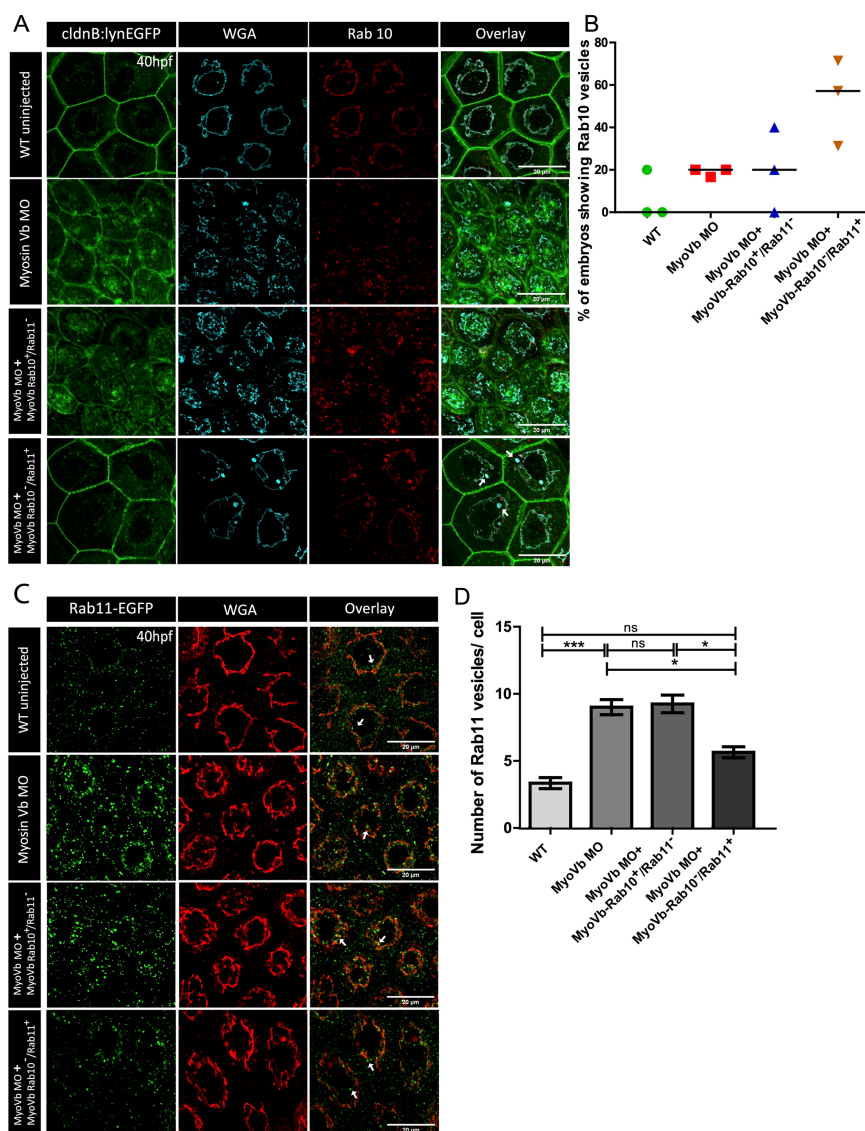

**Fig. S2.** The effect of Myosin Vb isoforms on Rab10 and Rab11 compartments

(A) Confocal images of the peridermal cells of the 40 hpf *Tg(cldnB:lynEGFP)* Myosin Vb morphants rescued with mRNA encoding for MyoVb-Rab10<sup>+</sup>/Rab11<sup>-</sup> or MyoVb-Rab10<sup>-</sup>/Rab11<sup>+</sup> and stained using anti-GFP antibody, WGA and anti-Rab10 antibody. (B) Quantification of percentage embryos showing Rab10 associated TGN phenotype in all the different genetic conditions mentioned. (C) Confocal images of the peridermal cells of the 40hpf *Tg(h2afx:EGFP Rab11a)<sup>mw6</sup>* MyoVb morphants rescued with MyoVb-Rab10<sup>+</sup>/Rab11<sup>-</sup> or MyoVb-Rab10<sup>-</sup>/Rab11<sup>+</sup> mRNA and labeled using anti-GFP antibody and WGA. (D) Quantification of the number of Rab11 vesicles in all the different genetic conditions mentioned.

Scale bars in A and C correspond to 20µm. White arrows in A and C point to Rab10 and Rab11 vesicles, respectively. Asterisks in D denote the statistical significance at p<0.05. Key pairwise comparisons are shown in D; for the rest of the comparisons please refer to Table S7.

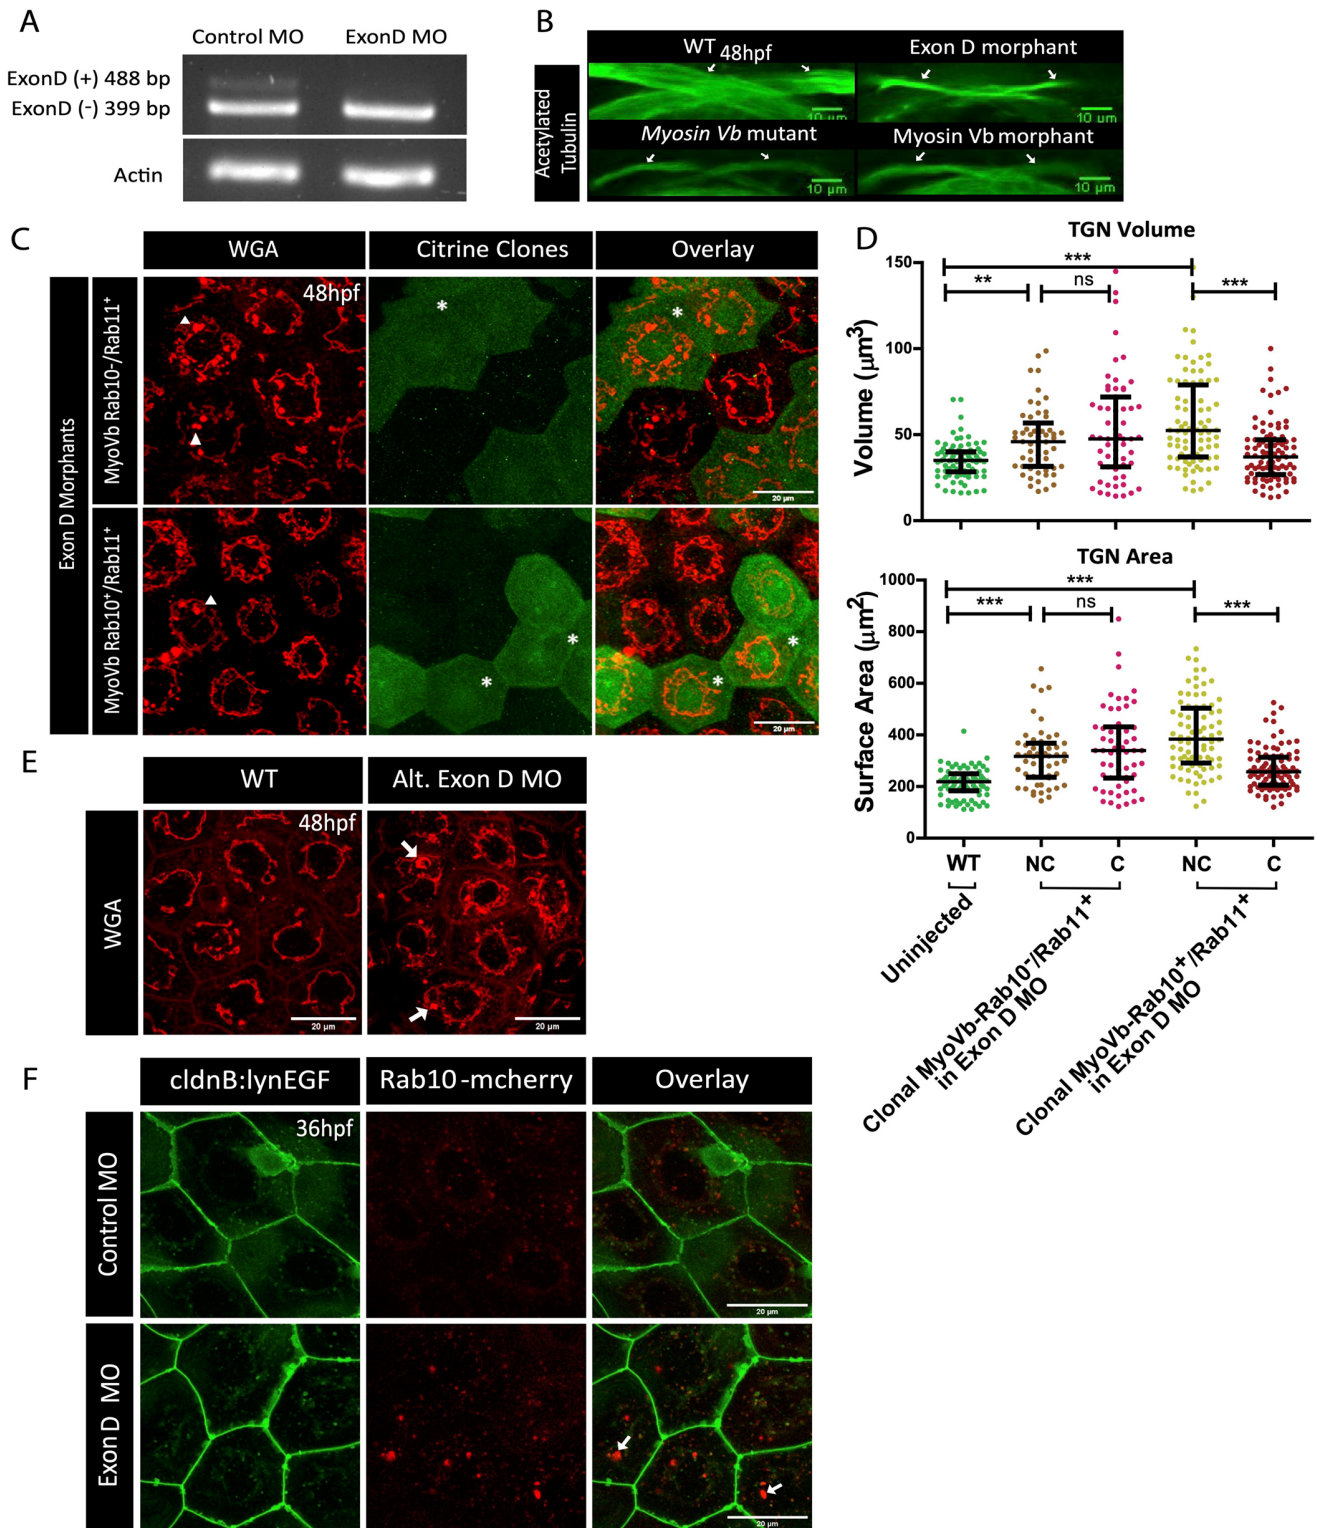

**Fig. S3.** Validation of Exon D morpholino.

(A) An RT-PCR analysis of control (control MO) and Exon D morphants (Exon D MO) at 48hpf reveals specific loss of 488 bp band representing isoform of Myosin Vb containing Exon D domain, upon morpholino injection, while the 399 bp band corresponding to the isoform without Exon D does not show any reduction. Actin is used as an RT-PCR control. (B) Confocal images of optic nerve of 48hpf wild type, Exon D morphants, *gsp* mutant and Myosin Vb morphants embryos stained using acetylated tubulin antibody. Note that Exon D morphants display thinning of optic nerve, which is also observed in the *gsp* mutants and Myosin Vb morphants. (C) Confocal images of 48 hpf *Tübingen* (*Tü*) embryos showing TGN and post-TGN marked with WGA in Exon D morphants clonally injected with either MyoVb-Rab10<sup>+</sup>/Rab11<sup>+</sup> or MyoVb-Rab10<sup>-</sup>/Rab11<sup>+</sup> mRNA along with Citrine mRNA (tracer) to mark the clones. (D) Quantification of TGN volume and surface area in clonal (=C) and non-clonal cells (=NC) in different genetic conditions mentioned in the figure. (E) WGA staining reveals that the alternative morpholino for Exon D splice site (Alt. Exon D MO) shows the similar branching and vesicle accumulation trans-Golgi phenotype. (F) Live confocal scan of the control and Exon D morphant peridermal cells at 36hpf show large Rab10-mCherry labeled vesicles in the morphants.

Scale bars in B correspond to 10µm and those in C, E and F to 20µm. White arrows in B indicate the optic nerve and those in E and F point to accumulated vesicles; white arrowheads and asterisks in C point to post-TGN vesicles and clones, respectively. Asterisks in D denote the statistical significance at  $p < 0.05$ . Only key pairwise comparisons are shown in D; for the rest of the comparisons please refer to Table S8.

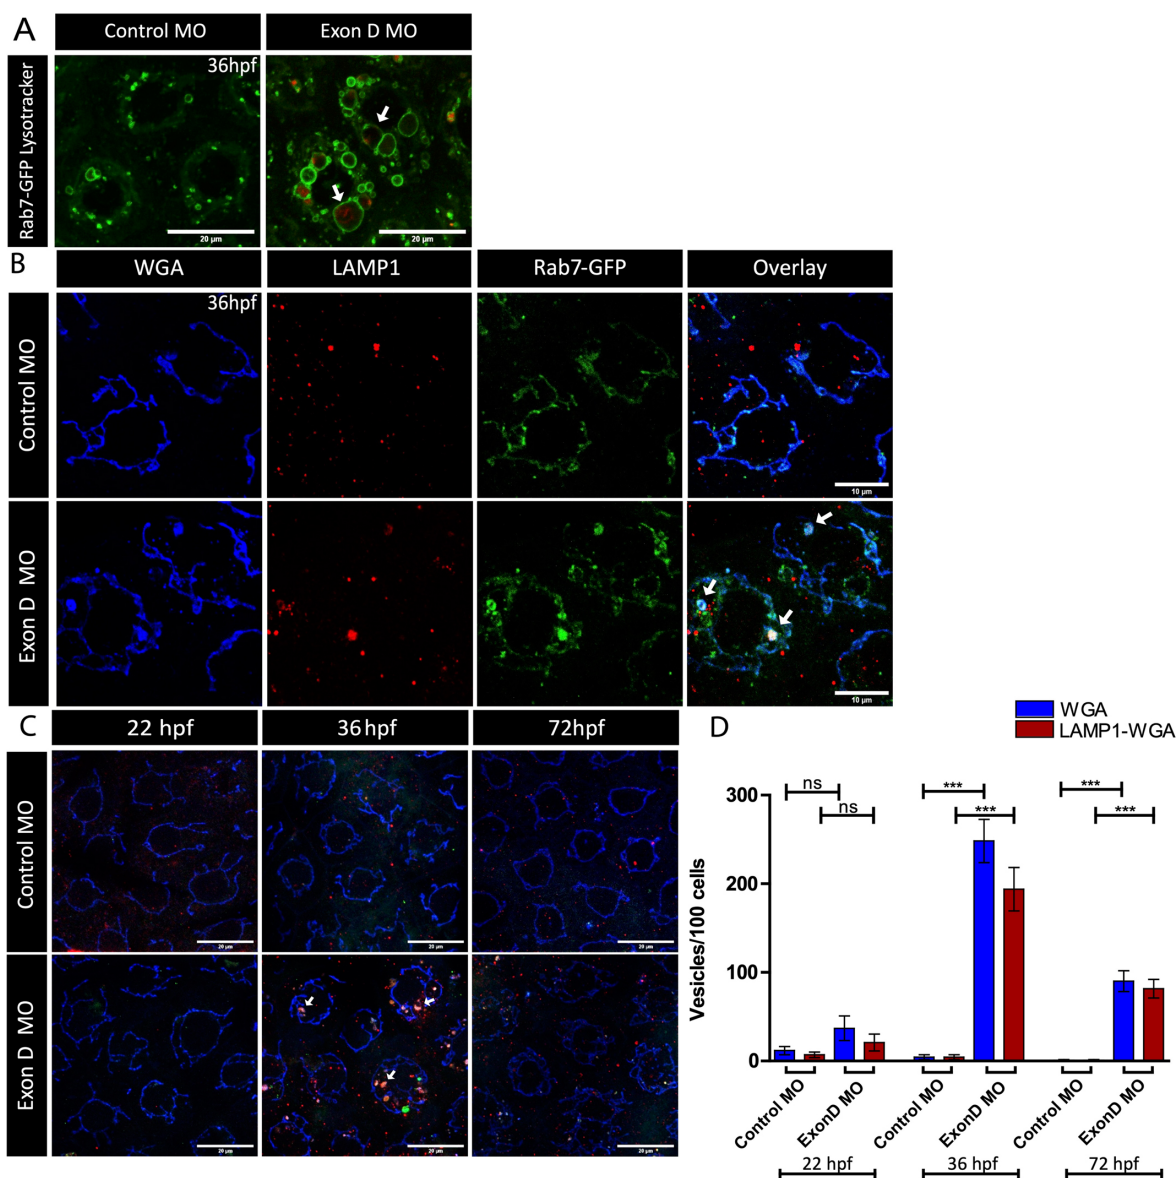

**Fig. S4.** Trans-Golgi vesicles accumulated upon the knockdown of Exon D isoform acquire late-endolysosomal fate in the peridermal cells.

Confocal images of the peridermal cells (A, B, C) of the embryos from *Tg(h2afx: EGFP-Rab7)<sup>mw7</sup>* line injected with Exon D morpholino and (A) labeled with lysotracker dye and imaged live at 36hpf or (B) immunolabeled with WGA and LAMP-1 upon fixation at 36-hpf or (C) during development at 22, 36 and 72hpf. Note the presence of large Rab7 marked vesicles (white arrows in A). Many of the large post trans-Golgi vesicles show co-labeling with Rab7 and LAMP-1 (white arrows in B and C), and their size decreases by 72hpf. (D) Quantification of vesicles (presented in C) stained with WGA and their fraction showing co-localization with LAMP1 at 22, 36 and 72 hpf.

Asterisks in D denote the statistical significance at  $p < 0.05$ . For detailed statistical analysis table please refer to Table S9. Scale bars in A and C corresponds to  $20\mu$  and those in B to  $10\mu$ .

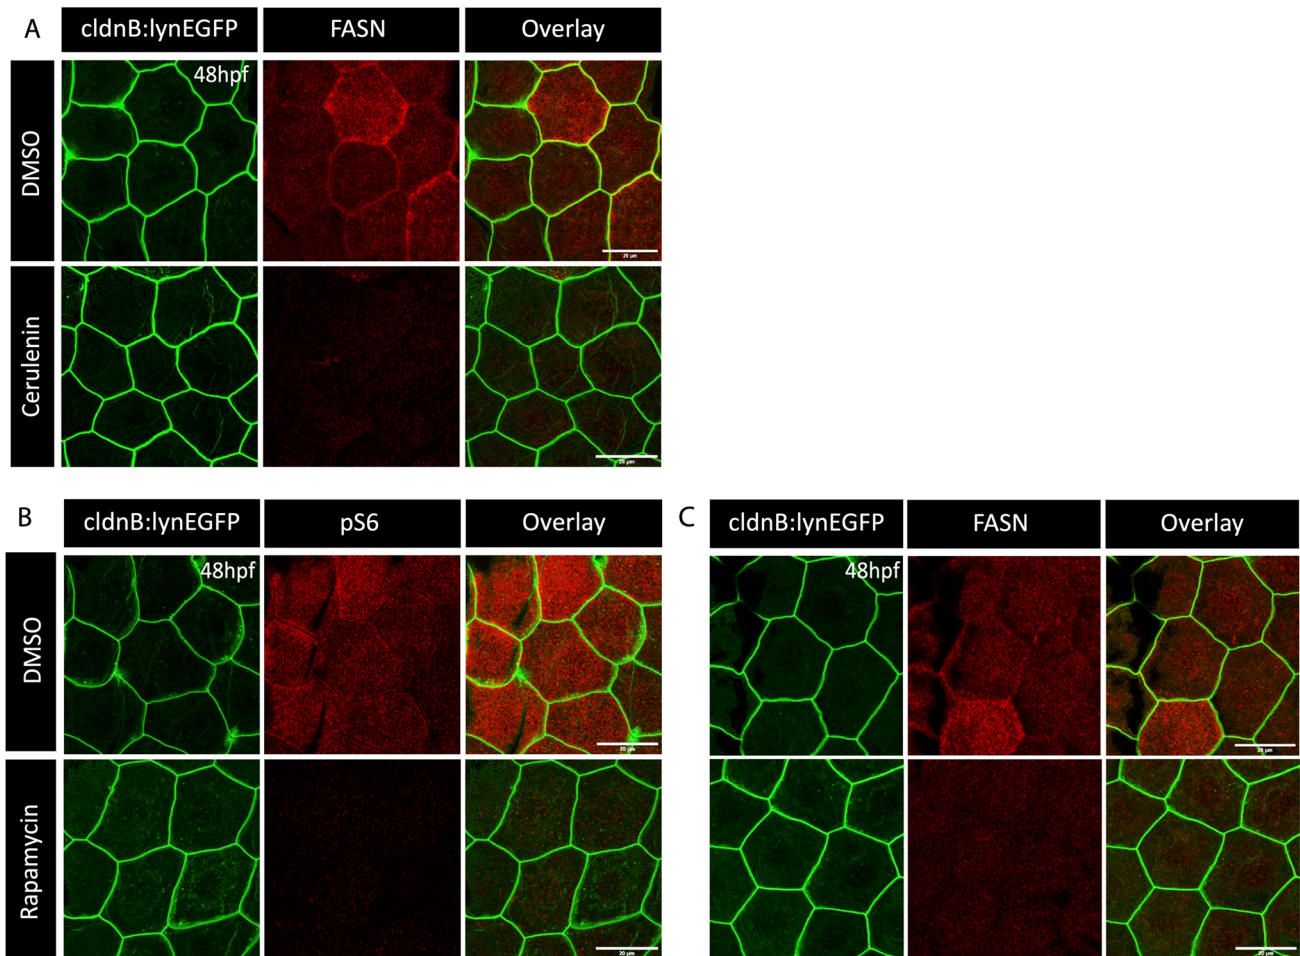

**Fig. S5.** Cerulenin treatment leads to a decrease in FASN levels while Rapamycin treatment results in a reduction in both pS6 and FASN levels in the peridermal cells. Immunostainings using anti-GFP (A, B, C), anti-pS6 (B) and anti-FASN (A, C) antibodies followed by confocal microscopy of 48h old embryos from the *Tg(cldnB:lynEGFP)* line treated with (A) Cerulenin and (B, C) Rapamycin. Scale bars in A, B and C equals to 20 $\mu$ .

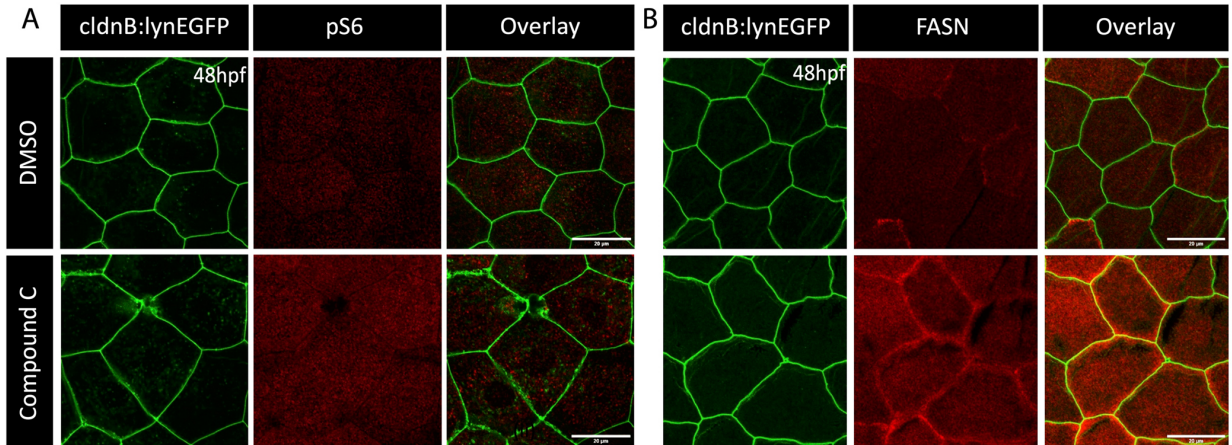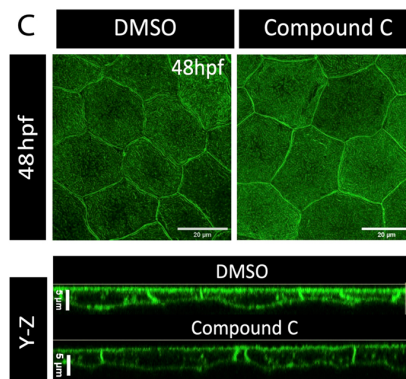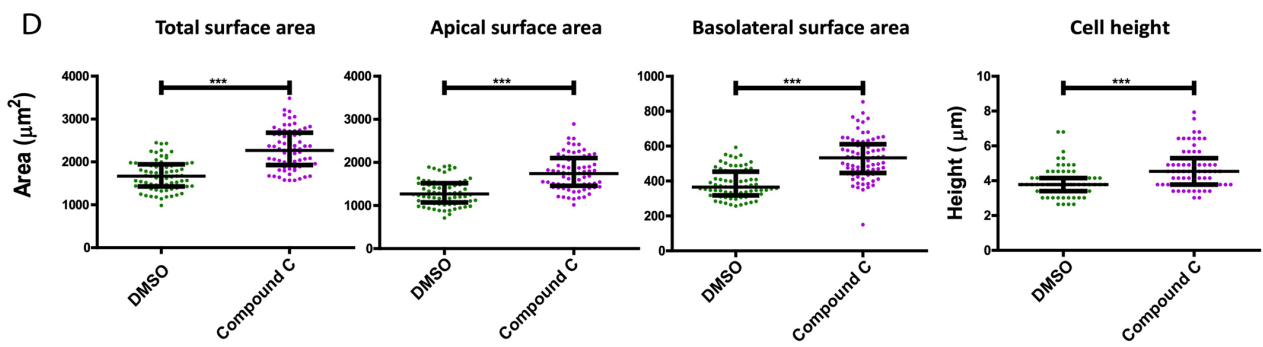

**Fig. S6.** Compound C treatment activates mTOR signaling and results in increased cell size in the zebrafish embryonic periderm.

Immunostaining using anti-GFP (A, B, C), anti-pS6 (A) and anti-FASN (B) antibodies at 48 hpf followed by confocal microscopy on embryos obtained from *Tg(cldnb:lynEGFP)* line and treated with compound C and DMSO as a vehicle control (A-C). Note that Compound C treated embryos display increased levels of mTOR downstream target - (A) pS6, and (B) FASN, and (C) increased size of peridermal cells. (D) Quantifications of the total, apical and basolateral surface area, and cell height in Compound C treated embryos.

Scale Bars in A-C (X-Y plane) correspond to 20 $\mu$  and in C (Y-Z plane) to 5 $\mu$ . Asterisks in D indicate statistically significant difference at  $p < 0.05$  (refer to Table S10).



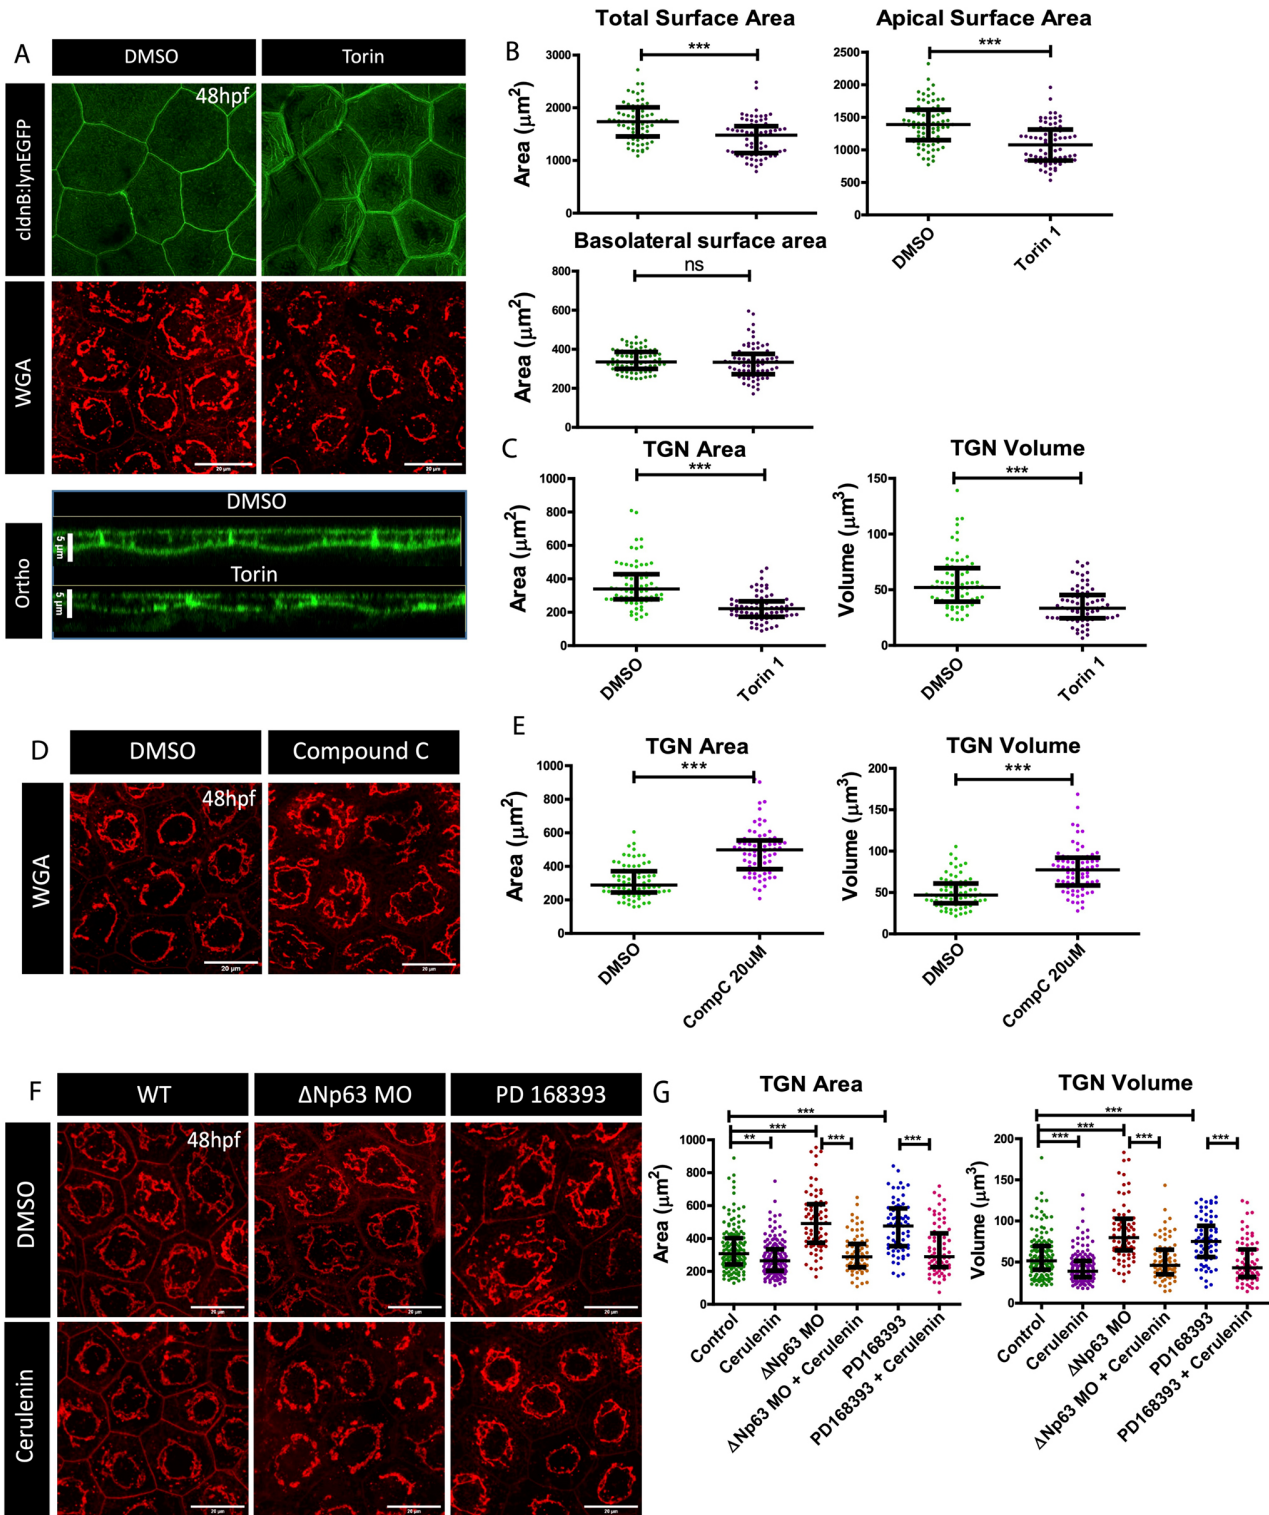

**Fig. S7.** mTOR signaling and FASN regulates cell size and TGN morphology in the peridermal cells.

(A) Confocal scans along X-Y and Y-Z planes of the peridermal cells from the embryos at 48hpf treated with DMSO or Torin 1, and stained using anti-GFP antibody and WGA (TGN).

(B) Graphical representation of quantification of total, apical, and basolateral surface area,

and (C) TGN area and volume upon Torin 1 treatment. Confocal micrographs showing WGA

marked peridermal TGN of (D) Compound C treated embryos or (F) Cerulenin treated  $\Delta$ Np63

morphants and PD16393 delivered embryos. (E, G) Quantifications of TGN surface area and

volume in given genetic conditions and/or under given treatments. Scale bars: X-Y plane =

20 $\mu$ ; Y-Z plane = 5 $\mu$ . Asterisks in B, C, E and G denote the statistically significant difference at

$p < 0.05$ . ns = not significant. Note that only the essential comparisons are shown in G. For the

complete list of comparisons please refer to Table S11.

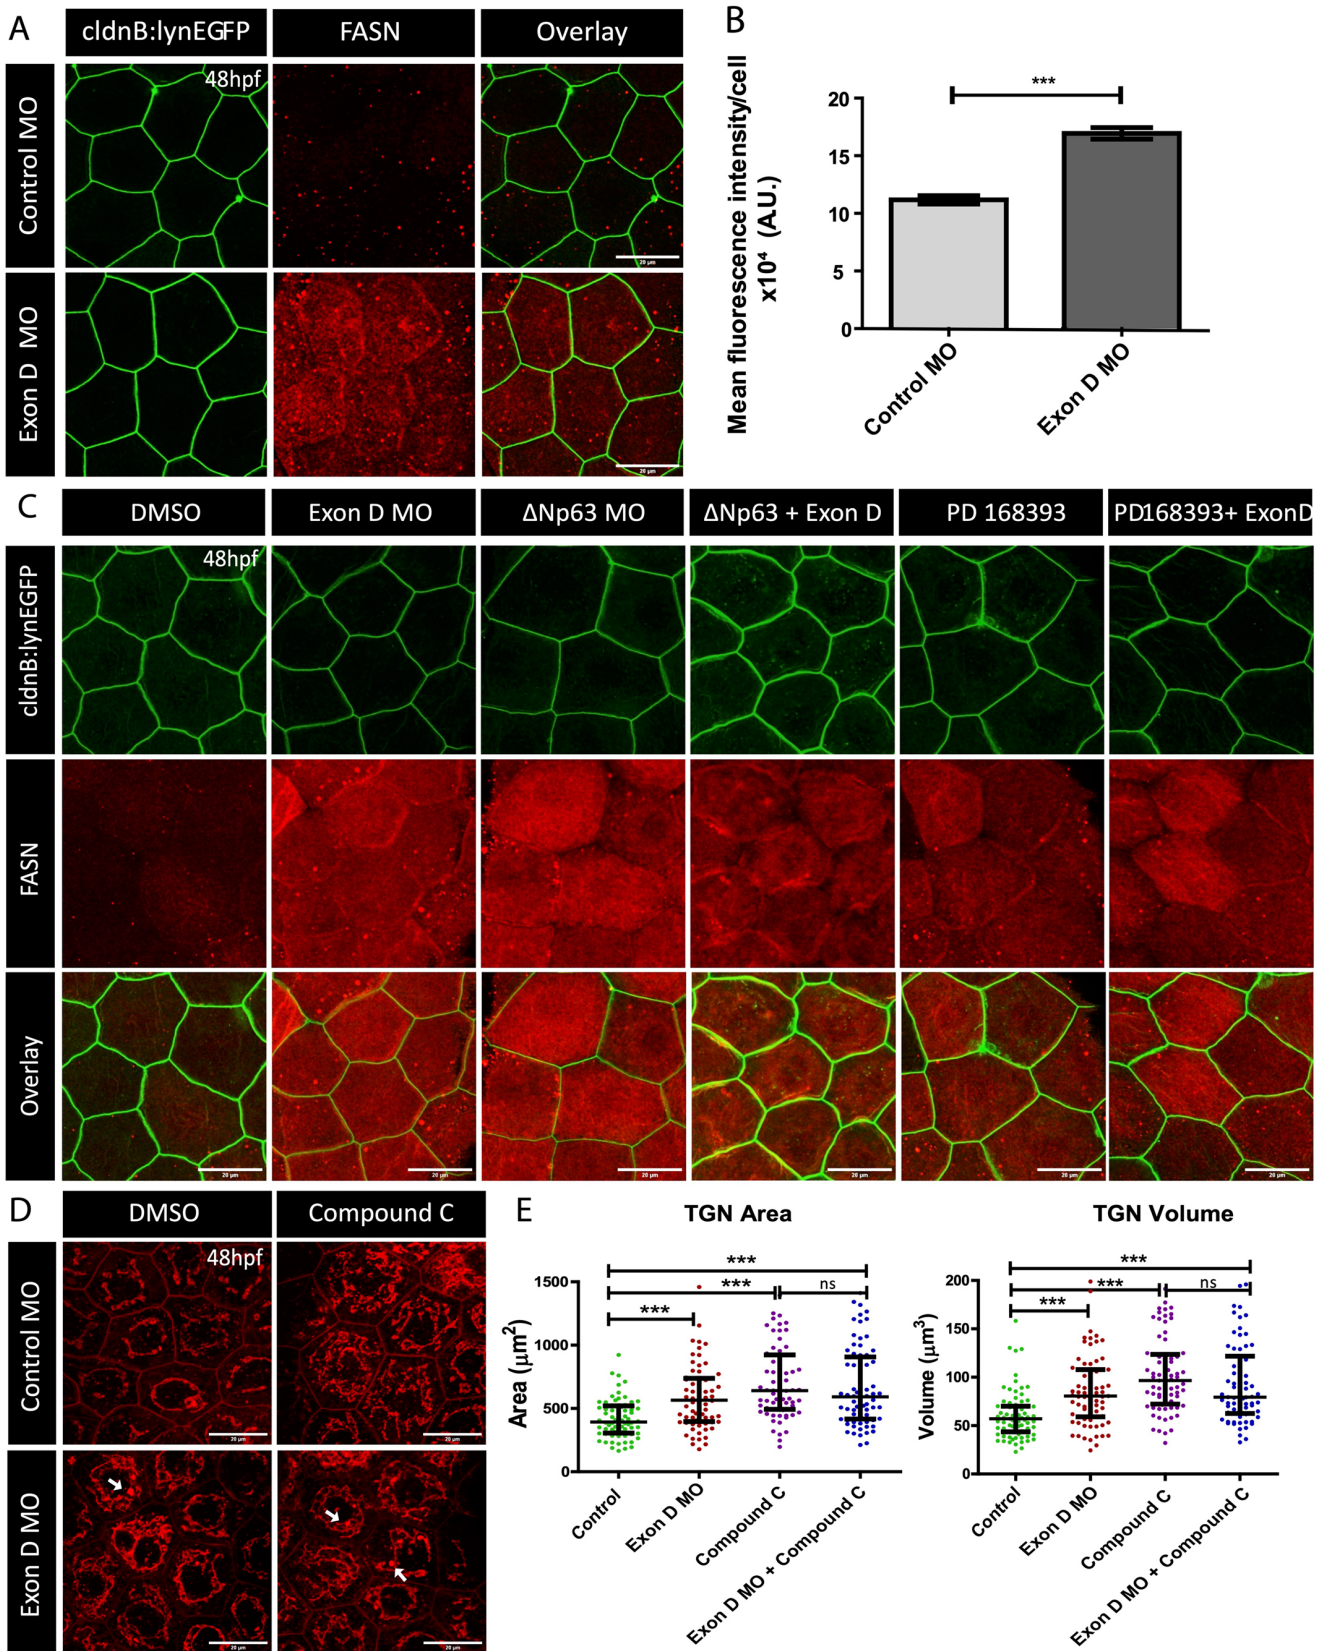

**Fig. S8.** FASN is upregulated upon cell proliferation inhibition in Exon D morphant; TGN expansion phenotype in Compound C treated embryos is not rescued upon Exon D knockdown.

Confocal images of the peridermal cells of 48hpf control and Exon D morphant *Tg(cldnB:lynEGFP)* embryos showing (A) FASN immunostaining and (B) intensity quantification. (C) Confocal images of the peridermal cells of 48hpf control and Exon D morphant embryos in *Tg(cldnB:lynEGFP)* background under cell proliferation inhibition ( $\Delta$ Np63 MO and PD16393 treatment) paradigms showing FASN immunostaining. (D) Confocal micrographs of WGA marked TGN in Exon D morphant *Tg(cldnB:lynEGFP)* embryos treated with Compound C or DMSO and (E) quantification of TGN surface and volume.

Scale bars in A, C and D = 20  $\mu$ . White arrows in D point to post trans-Golgi vesicles.

Asterisks in B and E denote the statistically significant difference at  $p < 0.05$ . Only essential pairwise comparisons are shown in E. For the complete list of pairwise comparisons please refer to Table S12.

**Table S1.** Statistical analyses for quantitative data in Figure 2.

(A) Statistical analysis for comparing TGN surface area and volume between control embryos and Exon D morphants as shown in Figure 2D:

|                                           |                        |
|-------------------------------------------|------------------------|
| Table Analyzed                            | TGN Surface Area       |
| Column A                                  | WT control             |
| vs                                        | vs                     |
| Column B                                  | ExonD MO               |
|                                           |                        |
| Mann Whitney test                         |                        |
| P value                                   | < 0.0001               |
| Exact or approximate P value?             | Gaussian Approximation |
| P value summary                           | ***                    |
| Are medians signif. different? (P < 0.05) | Yes                    |
| One- or two-tailed P value?               | Two-tailed             |
| Sum of ranks in column A,B                | 4160 , 7015            |

|                                           |                        |     |
|-------------------------------------------|------------------------|-----|
| Table Analyzed                            | TGN Volume             |     |
| Column A                                  | WT Control             |     |
| vs                                        | vs                     |     |
| Column B                                  | ExonD MO               |     |
|                                           |                        |     |
| Mann Whitney test                         |                        |     |
| P value                                   | < 0.0001               |     |
| Exact or approximate P value?             | Gaussian Approximation |     |
| P value summary                           | ***                    |     |
| Are medians signif. different? (P < 0.05) | Yes                    |     |
| One- or two-tailed P value?               | Two-tailed             |     |
| Sum of ranks in column A,B                | 4327                   | 848 |

(B) Statistical analysis of comparing BODIPY-ceramide vesicle count between control embryos and Exon D morphants as shown in Figure 2H:

|                                           |                        |
|-------------------------------------------|------------------------|
| Table Analyzed                            | Vesicle count          |
|                                           |                        |
| Column A                                  | Control                |
| vs                                        | vs                     |
| Column B                                  | Exon D MO              |
|                                           |                        |
| Mann Whitney test                         |                        |
| P value                                   | < 0.0001               |
| Exact or approximate P value?             | Gaussian Approximation |
| P value summary                           | ***                    |
| Are medians signif. different? (P < 0.05) | Yes                    |
| One- or two-tailed P value?               | Two-tailed             |
| Sum of ranks in column A, B               | 154, 342               |
| Mann-Whitney U                            | 18.00                  |

**Table S2.** Statistical comparison for cell surface area as shown in Figure 3. (A)

Statistical analysis for cell surface area quantification in Figure 3B.

|                                           |                        |
|-------------------------------------------|------------------------|
| Table Analyzed                            | Total surface area     |
| Column A                                  | Control MO             |
| vs                                        | vs                     |
| Column B                                  | Exon D MO              |
|                                           |                        |
| Mann Whitney test                         |                        |
| P value                                   | 0.0081                 |
| Exact or approximate P value?             | Gaussian Approximation |
| P value summary                           | **                     |
| Are medians signif. different? (P < 0.05) | Yes                    |
| One- or two-tailed P value?               | Two-tailed             |
| Sum of ranks in column A,B                | 4958 , 6367            |
| Mann-Whitney U                            | 2108                   |

|                                           |                        |
|-------------------------------------------|------------------------|
| Table Analyzed                            | Apical surface area    |
| Column A                                  | Control MO             |
| vs                                        | vs                     |
| Column B                                  | Exon D MO              |
|                                           |                        |
| Mann Whitney test                         |                        |
| P value                                   | 0.518                  |
| Exact or approximate P value?             | Gaussian Approximation |
| P value summary                           | ns                     |
| Are medians signif. different? (P < 0.05) | No                     |
| One- or two-tailed P value?               | Two-tailed             |
| Sum of ranks in column A,B                | 5490 , 5835            |
| Mann-Whitney U                            | 2640                   |

|                                           |                          |
|-------------------------------------------|--------------------------|
| Table Analyzed                            | basolateral surface area |
| Column A                                  | Control MO               |
| vs                                        | vs                       |
| Column B                                  | Exon D MO                |
|                                           |                          |
| Mann Whitney test                         |                          |
| P value                                   | < 0.0001                 |
| Exact or approximate P value?             | Gaussian Approximation   |
| P value summary                           | ***                      |
| Are medians signif. different? (P < 0.05) | Yes                      |
| One- or two-tailed P value?               | Two-tailed               |
| Sum of ranks in column A,B                | 3729 , 7596              |
| Mann-Whitney U                            | 879                      |

|                                           |                        |
|-------------------------------------------|------------------------|
| Table Analyzed                            | Cell Height            |
| Column A                                  | Control MO             |
| vs                                        | vs                     |
| Column B                                  | Exon D MO              |
|                                           |                        |
| Mann Whitney test                         |                        |
| P value                                   | < 0.0001               |
| Exact or approximate P value?             | Gaussian Approximation |
| P value summary                           | ***                    |
| Are medians signif. different? (P < 0.05) | Yes                    |
| One- or two-tailed P value?               | Two-tailed             |
| Sum of ranks in column A,B                | 3796 , 7530            |
| Mann-Whitney U                            | 945.5                  |



## (B) Statistical analysis for cell surface area quantification in Figure 3D.

|                                        |                        |                        |         |
|----------------------------------------|------------------------|------------------------|---------|
| Table Analyzed                         | Total surface area     |                        |         |
|                                        |                        |                        |         |
| Kruskal-Wallis test                    |                        |                        |         |
| P value                                | < 0.0001               |                        |         |
| Exact or approximate P value?          | Gaussian Approximation |                        |         |
| P value summary                        | ***                    |                        |         |
| Do the medians vary signif. (P < 0.05) | Yes                    |                        |         |
| Number of groups                       | 4                      |                        |         |
| Kruskal-Wallis statistic               | 171.8                  |                        |         |
|                                        |                        |                        |         |
| Dunn's Multiple Comparison Test        | Difference in rank sum | Significant? P < 0.05? | Summary |
| WT vs $\Delta$ Np63 MO                 | -143.6                 | Yes                    | ***     |
| WT vs DMSO                             | -22.45                 | No                     | ns      |
| WT vs PD168393                         | -139.4                 | Yes                    | ***     |
| $\Delta$ Np63 MO vs DMSO               | 121.1                  | Yes                    | ***     |
| $\Delta$ Np63 MO vs PD168393           | 4.187                  | No                     | ns      |
| DMSO vs PD168393                       | -117                   | Yes                    | ***     |

|                                        |                        |                        |         |
|----------------------------------------|------------------------|------------------------|---------|
| Table Analyzed                         | Apical surface area    |                        |         |
|                                        |                        |                        |         |
| Kruskal-Wallis test                    |                        |                        |         |
| P value                                | < 0.0001               |                        |         |
| Exact or approximate P value?          | Gaussian Approximation |                        |         |
| P value summary                        | ***                    |                        |         |
| Do the medians vary signif. (P < 0.05) | Yes                    |                        |         |
| Number of groups                       | 4                      |                        |         |
| Kruskal-Wallis statistic               | 174.9                  |                        |         |
|                                        |                        |                        |         |
| Dunn's Multiple Comparison Test        | Difference in rank sum | Significant? P < 0.05? | Summary |
| WT vs $\Delta$ Np63 MO                 | -144.9                 | Yes                    | ***     |
| WT vs DMSO                             | -31.52                 | No                     | ns      |
| WT vs PD168393                         | -147.8                 | Yes                    | ***     |
| $\Delta$ Np63 MO vs DMSO               | 113.3                  | Yes                    | ***     |
| $\Delta$ Np63 MO vs PD168393           | -2.907                 | No                     | ns      |
| DMSO vs PD168393                       | -116.2                 | Yes                    | ***     |

|                                        |                          |                        |         |
|----------------------------------------|--------------------------|------------------------|---------|
| Table Analyzed                         | Basolateral surface area |                        |         |
| Kruskal-Wallis test                    |                          |                        |         |
| P value                                | < 0.0001                 |                        |         |
| Exact or approximate P value?          | Gaussian Approximation   |                        |         |
| P value summary                        | ***                      |                        |         |
| Do the medians vary signif. (P < 0.05) | Yes                      |                        |         |
| Number of groups                       | 4                        |                        |         |
| Kruskal-Wallis statistic               | 46.65                    |                        |         |
|                                        |                          |                        |         |
| Dunn's Multiple Comparison Test        | Difference in rank sum   | Significant? P < 0.05? | Summary |
| WT vs $\Delta$ Np63 MO                 | -63.8                    | Yes                    | ***     |
| WT vs DMSO                             | 30.55                    | No                     | ns      |
| WT vs PD168393                         | -6.56                    | No                     | ns      |
| $\Delta$ Np63 MO vs DMSO               | 94.35                    | Yes                    | ***     |
| $\Delta$ Np63 MO vs PD168393           | 57.24                    | Yes                    | ***     |
| DMSO vs PD168393                       | -37.11                   | No                     | ns      |

|                                        |                        |                        |         |
|----------------------------------------|------------------------|------------------------|---------|
| Table Analyzed                         | Cell Height            |                        |         |
| Kruskal-Wallis test                    |                        |                        |         |
| P value                                | < 0.0001               |                        |         |
| Exact or approximate P value?          | Gaussian Approximation |                        |         |
| P value summary                        | ***                    |                        |         |
| Do the medians vary signif. (P < 0.05) | Yes                    |                        |         |
| Number of groups                       | 4                      |                        |         |
| Kruskal-Wallis statistic               | 81.61                  |                        |         |
|                                        |                        |                        |         |
| Dunn's Multiple Comparison Test        | Difference in rank sum | Significant? P < 0.05? | Summary |
| WT vs $\Delta$ Np63 MO                 | 110.4                  | Yes                    | ***     |
| WT vs DMSO                             | 44.27                  | Yes                    | **      |
| WT vs PD168393                         | 100.4                  | Yes                    | ***     |
| $\Delta$ Np63 MO vs DMSO               | -66.11                 | Yes                    | ***     |
| $\Delta$ Np63 MO vs PD168393           | -10.03                 | No                     | ns      |
| DMSO vs PD168393                       | 56.08                  | Yes                    | ***     |

## (C) Statistical analysis for cell surface area quantification in Figure 3F.

|                                            |                        |                        |         |
|--------------------------------------------|------------------------|------------------------|---------|
| Table Analyzed                             | Total surface area     |                        |         |
| Kruskal-Wallis test                        |                        |                        |         |
| P value                                    | < 0.0001               |                        |         |
| Exact or approximate P value?              | Gaussian Approximation |                        |         |
| P value summary                            | ***                    |                        |         |
| Do the medians vary signif. (P < 0.05)     | Yes                    |                        |         |
| Number of groups                           | 7                      |                        |         |
| Kruskal-Wallis statistic                   | 123.4                  |                        |         |
| Dunn's Multiple Comparison Test            | Difference in rank sum | Significant? P < 0.05? | Summary |
| WT vs DMSO                                 | -15.99                 | No                     | ns      |
| WT vs ExonD MO                             | -60.57                 | No                     | ns      |
| WT vs PD                                   | -192.4                 | Yes                    | ***     |
| WT vs PD+ExonD                             | -38.23                 | No                     | ns      |
| WT vs $\Delta$ Np63 MO                     | -204                   | Yes                    | ***     |
| WT vs $\Delta$ Np63 MO+ExonD               | -51.47                 | No                     | ns      |
| DMSO vs ExonD MO                           | -44.58                 | No                     | ns      |
| DMSO vs PD                                 | -176.4                 | Yes                    | ***     |
| DMSO vs PD+ExonD                           | -22.23                 | No                     | ns      |
| DMSO vs $\Delta$ Np63 MO                   | -188                   | Yes                    | ***     |
| DMSO vs $\Delta$ Np63 MO+ExonD             | -35.48                 | No                     | ns      |
| ExonD MO vs PD                             | -131.8                 | Yes                    | ***     |
| ExonD MO vs PD+ExonD                       | 22.35                  | No                     | ns      |
| ExonD MO vs $\Delta$ Np63 MO               | -143.4                 | Yes                    | ***     |
| ExonD MO vs $\Delta$ Np63 MO+ExonD         | 9.1                    | No                     | ns      |
| PD vs PD+ExonD                             | 154.2                  | Yes                    | ***     |
| PD vs $\Delta$ Np63 MO                     | -11.57                 | No                     | ns      |
| PD vs $\Delta$ Np63 MO+ExonD               | 140.9                  | Yes                    | ***     |
| PD+ExonD vs $\Delta$ Np63 MO               | -165.7                 | Yes                    | ***     |
| PD+ExonD vs $\Delta$ Np63 MO+ExonD         | -13.25                 | No                     | ns      |
| $\Delta$ Np63 MO vs $\Delta$ Np63 MO+ExonD | 152.5                  | Yes                    | ***     |

|                                        |                        |                        |         |
|----------------------------------------|------------------------|------------------------|---------|
| Table Analyzed                         | Apical surface area    |                        |         |
| Kruskal-Wallis test                    |                        |                        |         |
| P value                                | < 0.0001               |                        |         |
| Exact or approximate P value?          | Gaussian Approximation |                        |         |
| P value summary                        | ***                    |                        |         |
| Do the medians vary signif. (P < 0.05) | Yes                    |                        |         |
| Number of groups                       | 7                      |                        |         |
| Kruskal-Wallis statistic               | 153.4                  |                        |         |
|                                        |                        |                        |         |
| Dunn's Multiple Comparison Test        | Difference in rank sum | Significant? P < 0.05? | Summary |
| WT vs DMSO                             | -6.707                 | No                     | ns      |
| WT vs exonD                            | -18.87                 | No                     | ns      |
| WT vs PD                               | -187.2                 | Yes                    | ***     |
| WT vs PD+exonD                         | 9.633                  | No                     | ns      |
| WT vs $\Delta$ Np63                    | -200.4                 | Yes                    | ***     |
| WT vs $\Delta$ Np63+exonD              | -12.45                 | No                     | ns      |
| DMSO vs exonD                          | -12.17                 | No                     | ns      |
| DMSO vs PD                             | -180.5                 | Yes                    | ***     |
| DMSO vs PD+exonD                       | 16.34                  | No                     | ns      |
| DMSO vs $\Delta$ Np63                  | -193.7                 | Yes                    | ***     |
| DMSO vs $\Delta$ Np63+exonD            | -5.74                  | No                     | ns      |
| exonD vs PD                            | -168.4                 | Yes                    | ***     |
| exonD vs PD+exonD                      | 28.51                  | No                     | ns      |
| exonD vs $\Delta$ Np63                 | -181.5                 | Yes                    | ***     |
| exonD vs $\Delta$ Np63+exonD           | 6.425                  | No                     | ns      |
| PD vs PD+exonD                         | 196.9                  | Yes                    | ***     |
| PD vs $\Delta$ Np63                    | -13.14                 | No                     | ns      |
| PD vs $\Delta$ Np63+exonD              | 174.8                  | Yes                    | ***     |
| PD+exonD vs $\Delta$ Np63              | -210                   | Yes                    | ***     |
| PD+exonD vs $\Delta$ Np63+exonD        | -22.08                 | No                     | ns      |
| $\Delta$ Np63 vs $\Delta$ Np63+exonD   | 187.9                  | Yes                    | ***     |

|                                            |                          |                        |         |
|--------------------------------------------|--------------------------|------------------------|---------|
| Table Analyzed                             | Basolateral surface area |                        |         |
| Kruskal-Wallis test                        |                          |                        |         |
| P value                                    | < 0.0001                 |                        |         |
| Exact or approximate P value?              | Gaussian Approximation   |                        |         |
| P value summary                            | ***                      |                        |         |
| Do the medians vary signif. (P < 0.05)     | Yes                      |                        |         |
| Number of groups                           | 7                        |                        |         |
| Kruskal-Wallis statistic                   | 127.6                    |                        |         |
|                                            |                          |                        |         |
| Dunn's Multiple Comparison Test            | Difference in rank sum   | Significant? P < 0.05? | Summary |
| WT vs DMSO                                 | -41.49                   | No                     | ns      |
| WT vs exonD                                | -183.3                   | Yes                    | ***     |
| WT vs PD                                   | -77.72                   | No                     | ns      |
| WT vs PD+exonD                             | -203.5                   | Yes                    | ***     |
| WT vs $\Delta$ Np63 MO                     | -45.07                   | No                     | ns      |
| WT vs $\Delta$ Np63 MO+ExonD               | -180.9                   | Yes                    | ***     |
| DMSO vs exonD                              | -141.8                   | Yes                    | ***     |
| DMSO vs PD                                 | -36.23                   | No                     | ns      |
| DMSO vs PD+exonD                           | -162                     | Yes                    | ***     |
| DMSO vs $\Delta$ Np63 MO                   | -3.587                   | No                     | ns      |
| DMSO vs $\Delta$ Np63 MO+ExonD             | -139.4                   | Yes                    | ***     |
| exonD vs PD                                | 105.6                    | Yes                    | ***     |
| exonD vs PD+exonD                          | -20.15                   | No                     | ns      |
| exonD vs $\Delta$ Np63 MO                  | 138.3                    | Yes                    | ***     |
| exonD vs $\Delta$ Np63 MO+ExonD            | 2.458                    | No                     | ns      |
| PD vs PD+exonD                             | -125.8                   | Yes                    | ***     |
| PD vs $\Delta$ Np63 MO                     | 32.65                    | No                     | ns      |
| PD vs $\Delta$ Np63 MO+ExonD               | -103.2                   | Yes                    | **      |
| PD+exonD vs $\Delta$ Np63 MO               | 158.4                    | Yes                    | ***     |
| PD+exonD vs $\Delta$ Np63 MO+ExonD         | 22.61                    | No                     | ns      |
| $\Delta$ Np63 MO vs $\Delta$ Np63 MO+ExonD | -135.8                   | Yes                    | ***     |

|                                          |                        |                        |         |
|------------------------------------------|------------------------|------------------------|---------|
| Table Analyzed                           | Cell height            |                        |         |
| Kruskal-Wallis test                      |                        |                        |         |
| P value                                  | < 0.0001               |                        |         |
| Exact or approximate P value?            | Gaussian Approximation |                        |         |
| P value summary                          | ***                    |                        |         |
| Do the medians vary signif. (P < 0.05)   | Yes                    |                        |         |
| Number of groups                         | 7                      |                        |         |
| Kruskal-Wallis statistic                 | 256.3                  |                        |         |
|                                          |                        |                        |         |
| Dunn's Multiple Comparison Test          | Difference in rank sum | Significant? P < 0.05? | Summary |
| WT vs DMSO                               | -29.53                 | No                     | ns      |
| WT vs Exon D MO                          | -134.8                 | Yes                    | ***     |
| WT vs PD                                 | 82.86                  | Yes                    | *       |
| WT vs PD+Exon D                          | -176.9                 | Yes                    | ***     |
| WT vs $\Delta$ Np63 MO                   | 136.7                  | Yes                    | ***     |
| WT vs $\Delta$ Np63+ ExonD               | -124.4                 | Yes                    | ***     |
| DMSO vs Exon D MO                        | -105.2                 | Yes                    | ***     |
| DMSO vs PD                               | 112.4                  | Yes                    | ***     |
| DMSO vs PD+Exon D                        | -147.4                 | Yes                    | ***     |
| DMSO vs $\Delta$ Np63 MO                 | 166.2                  | Yes                    | ***     |
| DMSO vs $\Delta$ Np63+ ExonD             | -94.91                 | Yes                    | **      |
| Exon D MO vs PD                          | 217.6                  | Yes                    | ***     |
| Exon D MO vs PD+Exon D                   | -42.17                 | No                     | ns      |
| Exon D MO vs $\Delta$ Np63 MO            | 271.5                  | Yes                    | ***     |
| Exon D MO vs $\Delta$ Np63+ ExonD        | 10.33                  | No                     | ns      |
| PD vs PD+Exon D                          | -259.8                 | Yes                    | ***     |
| PD vs $\Delta$ Np63 MO                   | 53.86                  | No                     | ns      |
| PD vs $\Delta$ Np63+ ExonD               | -207.3                 | Yes                    | ***     |
| PD+Exon D vs $\Delta$ Np63 MO            | 313.6                  | Yes                    | ***     |
| PD+Exon D vs $\Delta$ Np63+ ExonD        | 52.49                  | No                     | ns      |
| $\Delta$ Np63 MO vs $\Delta$ Np63+ ExonD | -261.2                 | Yes                    | ***     |

**Table S3.** Statistical comparison for cell surface area as shown in Figure 4. (A)

Statistical analysis for FASN quantification in Figure 4B.

|                                           |                        |
|-------------------------------------------|------------------------|
| Table Analyzed                            | Mean intensity         |
| Column A                                  | DMSO                   |
| vs                                        | vs                     |
| Column B                                  | PD 168393              |
|                                           |                        |
| Mann Whitney test                         |                        |
| P value                                   | < 0.0001               |
| Exact or approximate P value?             | Gaussian Approximation |
| P value summary                           | ***                    |
| Are medians signif. different? (P < 0.05) | Yes                    |
| One- or two-tailed P value?               | Two-tailed             |
| Sum of ranks in column A,B                | 3655 , 6215            |
| Mann-Whitney U                            | 1170                   |

|                                           |                        |
|-------------------------------------------|------------------------|
| Table Analyzed                            | Mean Intensity         |
| Column A                                  | WT                     |
| vs                                        | vs                     |
| Column B                                  | $\Delta$ Np63          |
|                                           |                        |
| Mann Whitney test                         |                        |
| P value                                   | < 0.0001               |
| Exact or approximate P value?             | Gaussian Approximation |
| P value summary                           | ***                    |
| Are medians signif. different? (P < 0.05) | Yes                    |
| One- or two-tailed P value?               | Two-tailed             |
| Sum of ranks in column A,B                | 4250 , 7075            |
| Mann-Whitney U                            | 1400                   |

## (B) Statistical analysis for cell surface area quantification in Figure 4E.

|                                         |                        |                        |         |
|-----------------------------------------|------------------------|------------------------|---------|
| Table Analyzed                          | Total Surface Area     |                        |         |
| Kruskal-Wallis test                     |                        |                        |         |
| P value                                 | < 0.0001               |                        |         |
| Exact or approximate P value?           | Gaussian Approximation |                        |         |
| P value summary                         | ***                    |                        |         |
| Do the medians vary signif. (P < 0.05)  | Yes                    |                        |         |
| Number of groups                        | 6                      |                        |         |
| Kruskal-Wallis statistic                | 324.7                  |                        |         |
| Dunn's Multiple Comparison Test         | Difference in rank sum | Significant? P < 0.05? | Summary |
| DMSO vs PD168393                        | -152.3                 | Yes                    | ***     |
| DMSO vs Cerulenin                       | 182.6                  | Yes                    | ***     |
| DMSO vs PD 168393 +Cerulenin            | 67.07                  | No                     | ns      |
| DMSO vs ΔNp63                           | -180                   | Yes                    | ***     |
| DMSO vs ΔNp63 Cerulenin                 | 88.13                  | Yes                    | **      |
| PD168393 vs Cerulenin                   | 334.9                  | Yes                    | ***     |
| PD168393 vs PD 168393 +Cerulenin        | 219.4                  | Yes                    | ***     |
| PD168393 vs ΔNp63                       | -27.63                 | No                     | ns      |
| PD168393 vs ΔNp63 Cerulenin             | 240.5                  | Yes                    | ***     |
| Cerulenin vs PD 168393 +Cerulenin       | -115.5                 | Yes                    | ***     |
| Cerulenin vs ΔNp63                      | -362.5                 | Yes                    | ***     |
| Cerulenin vs ΔNp63 Cerulenin            | -94.44                 | Yes                    | **      |
| PD 168393 +Cerulenin vs ΔNp63           | -247                   | Yes                    | ***     |
| PD 168393 +Cerulenin vs ΔNp63 Cerulenin | 21.05                  | No                     | ns      |
| ΔNp63 vs ΔNp63 Cerulenin                | 268.1                  | Yes                    | ***     |



|                                          |                        |                        |         |
|------------------------------------------|------------------------|------------------------|---------|
| Table Analyzed                           | Apical Surface Area    |                        |         |
| Kruskal-Wallis test                      |                        |                        |         |
| P value                                  | < 0.0001               |                        |         |
| Exact or approximate P value?            | Gaussian Approximation |                        |         |
| P value summary                          | ***                    |                        |         |
| Do the medians vary signif. (P < 0.05)   | Yes                    |                        |         |
| Number of groups                         | 6                      |                        |         |
| Kruskal-Wallis statistic                 | 323.7                  |                        |         |
|                                          |                        |                        |         |
| Dunn's Multiple Comparison Test          | Difference in rank sum | Significant? P < 0.05? | Summary |
| DMSO vs PD168393                         | -155.8                 | Yes                    | ***     |
| DMSO vs Cerulenin                        | 184.5                  | Yes                    | ***     |
| DMSO vs PD 168393 + Cerulenin            | 58.69                  | No                     | ns      |
| DMSO vs ΔNp63                            | -174.6                 | Yes                    | ***     |
| DMSO vs ΔNp63 Cerulenin                  | 87.54                  | Yes                    | **      |
| PD168393 vs Cerulenin                    | 340.4                  | Yes                    | ***     |
| PD168393 vs PD 168393 + Cerulenin        | 214.5                  | Yes                    | ***     |
| PD168393 vs ΔNp63                        | -18.71                 | No                     | ns      |
| PD168393 vs ΔNp63 Cerulenin              | 243.4                  | Yes                    | ***     |
| Cerulenin vs PD 168393 + Cerulenin       | -125.8                 | Yes                    | ***     |
| Cerulenin vs ΔNp63                       | -359.1                 | Yes                    | ***     |
| Cerulenin vs ΔNp63 Cerulenin             | -96.97                 | Yes                    | **      |
| PD 168393 + Cerulenin vs ΔNp63           | -233.2                 | Yes                    | ***     |
| PD 168393 + Cerulenin vs ΔNp63 Cerulenin | 28.85                  | No                     | ns      |
| ΔNp63 vs ΔNp63 Cerulenin                 | 262.1                  | Yes                    | ***     |

|                                          |                          |                        |         |
|------------------------------------------|--------------------------|------------------------|---------|
| Table Analyzed                           | Basolateral Surface Area |                        |         |
| Kruskal-Wallis test                      |                          |                        |         |
| P value                                  | < 0.0001                 |                        |         |
| Exact or approximate P value?            | Gaussian Approximation   |                        |         |
| P value summary                          | ***                      |                        |         |
| Do the medians vary signif. (P < 0.05)   | Yes                      |                        |         |
| Number of groups                         | 6                        |                        |         |
| Kruskal-Wallis statistic                 | 133.8                    |                        |         |
| Dunn's Multiple Comparison Test          | Difference in rank sum   | Significant? P < 0.05? | Summary |
| DMSO vs PD168393                         | -57.35                   | No                     | ns      |
| DMSO vs Cerulenin                        | 105                      | Yes                    | ***     |
| DMSO vs PD 168393 + Cerulenin            | 91.97                    | Yes                    | **      |
| DMSO vs ΔNp63                            | -140.7                   | Yes                    | ***     |
| DMSO vs ΔNp63 Cerulenin                  | 57.15                    | No                     | ns      |
| PD168393 vs Cerulenin                    | 162.3                    | Yes                    | ***     |
| PD168393 vs PD 168393 + Cerulenin        | 149.3                    | Yes                    | ***     |
| PD168393 vs ΔNp63                        | -83.32                   | Yes                    | *       |
| PD168393 vs ΔNp63 Cerulenin              | 114.5                    | Yes                    | ***     |
| Cerulenin vs PD 168393 + Cerulenin       | -12.99                   | No                     | ns      |
| Cerulenin vs ΔNp63                       | -245.6                   | Yes                    | ***     |
| Cerulenin vs ΔNp63 Cerulenin             | -47.81                   | No                     | ns      |
| PD 168393 + Cerulenin vs ΔNp63           | -232.6                   | Yes                    | ***     |
| PD 168393 + Cerulenin vs ΔNp63 Cerulenin | -34.82                   | No                     | ns      |
| ΔNp63 vs ΔNp63 Cerulenin                 | 197.8                    | Yes                    | ***     |

## (C) Statistical analysis for cell surface area quantification in Figure 4F.

|                                               |                         |                        |         |
|-----------------------------------------------|-------------------------|------------------------|---------|
| Table Analyzed                                | Total Cell Surface Area |                        |         |
| Kruskal-Wallis test                           |                         |                        |         |
| P value                                       | < 0.0001                |                        |         |
| Exact or approximate P value?                 | Gaussian Approximation  |                        |         |
| P value summary                               | ***                     |                        |         |
| Do the medians vary signif. (P < 0.05)        | Yes                     |                        |         |
| Number of groups                              | 6                       |                        |         |
| Kruskal-Wallis statistic                      | 183.2                   |                        |         |
| Dunn's Multiple Comparison Test               | Difference in rank sum  | Significant? P < 0.05? | Summary |
| DMSO vs Rapamycin                             | 25.75                   | No                     | ns      |
| DMSO vs $\Delta$ Np63 MO                      | -222.9                  | Yes                    | ***     |
| DMSO vs $\Delta$ Np63+Rapamycin               | -30.37                  | No                     | ns      |
| DMSO vs PD168393                              | -184.2                  | Yes                    | ***     |
| DMSO vs PD168393+Rapamycin                    | 45.17                   | No                     | ns      |
| Rapamycin vs $\Delta$ Np63 MO                 | -248.7                  | Yes                    | ***     |
| Rapamycin vs $\Delta$ Np63+Rapamycin          | -56.12                  | No                     | ns      |
| Rapamycin vs PD168393                         | -210                    | Yes                    | ***     |
| Rapamycin vs PD168393+Rapamycin               | 19.42                   | No                     | ns      |
| $\Delta$ Np63 MO vs $\Delta$ Np63+Rapamycin   | 192.5                   | Yes                    | ***     |
| $\Delta$ Np63 MO vs PD168393                  | 38.69                   | No                     | ns      |
| $\Delta$ Np63 MO vs PD168393+Rapamycin        | 268.1                   | Yes                    | ***     |
| $\Delta$ Np63+Rapamycin vs PD168393           | -153.8                  | Yes                    | ***     |
| $\Delta$ Np63+Rapamycin vs PD168393+Rapamycin | 75.54                   | No                     | ns      |
| PD168393 vs PD168393+Rapamycin                | 229.4                   | Yes                    | ***     |

|                                               |                        |                        |         |
|-----------------------------------------------|------------------------|------------------------|---------|
| Table Analyzed                                | Apical Surface Area    |                        |         |
| Kruskal-Wallis test                           |                        |                        |         |
| P value                                       | < 0.0001               |                        |         |
| Exact or approximate P value?                 | Gaussian Approximation |                        |         |
| P value summary                               | ***                    |                        |         |
| Do the medians vary signif. (P < 0.05)        | Yes                    |                        |         |
| Number of groups                              | 6                      |                        |         |
| Kruskal-Wallis statistic                      | 179.7                  |                        |         |
| Dunn's Multiple Comparison Test               | Difference in rank sum | Significant? P < 0.05? | Summary |
| DMSO vs Rapamycin                             | 34.78                  | No                     | ns      |
| DMSO vs $\Delta$ Np63 MO                      | -214.6                 | Yes                    | ***     |
| DMSO vs $\Delta$ Np63+Rapamycin               | -24.31                 | No                     | ns      |
| DMSO vs PD168393                              | -182.3                 | Yes                    | ***     |
| DMSO vs PD168393+Rapamycin                    | 41.5                   | No                     | ns      |
| Rapamycin vs $\Delta$ Np63 MO                 | -249.3                 | Yes                    | ***     |
| Rapamycin vs $\Delta$ Np63+Rapamycin          | -59.09                 | No                     | ns      |
| Rapamycin vs PD168393                         | -217.1                 | Yes                    | ***     |
| Rapamycin vs PD168393+Rapamycin               | 6.717                  | No                     | ns      |
| $\Delta$ Np63 MO vs $\Delta$ Np63+Rapamycin   | 190.3                  | Yes                    | ***     |
| $\Delta$ Np63 MO vs PD168393                  | 32.23                  | No                     | ns      |
| $\Delta$ Np63 MO vs PD168393+Rapamycin        | 256.1                  | Yes                    | ***     |
| $\Delta$ Np63+Rapamycin vs PD168393           | -158                   | Yes                    | ***     |
| $\Delta$ Np63+Rapamycin vs PD168393+Rapamycin | 65.81                  | No                     | ns      |
| PD168393 vs PD168393+Rapamycin                | 223.8                  | Yes                    | ***     |

|                                               |                          |                        |         |
|-----------------------------------------------|--------------------------|------------------------|---------|
| Table Analyzed                                | Basolateral Surface Area |                        |         |
| Kruskal-Wallis test                           |                          |                        |         |
| P value                                       | < 0.0001                 |                        |         |
| Exact or approximate P value?                 | Gaussian Approximation   |                        |         |
| P value summary                               | ***                      |                        |         |
| Do the medians vary signif. (P < 0.05)        | Yes                      |                        |         |
| Number of groups                              | 6                        |                        |         |
| Kruskal-Wallis statistic                      | 74.63                    |                        |         |
| Dunn's Multiple Comparison Test               | Difference in rank sum   | Significant? P < 0.05? | Summary |
| DMSO vs Rapamycin                             | 9.973                    | No                     | ns      |
| DMSO vs $\Delta$ Np63 MO                      | -146.5                   | Yes                    | ***     |
| DMSO vs $\Delta$ Np63+Rapamycin               | -20.27                   | No                     | ns      |
| DMSO vs PD168393                              | -107.2                   | Yes                    | ***     |
| DMSO vs PD168393+Rapamycin                    | 43.34                    | No                     | ns      |
| Rapamycin vs $\Delta$ Np63 MO                 | -156.5                   | Yes                    | ***     |
| Rapamycin vs $\Delta$ Np63+Rapamycin          | -30.24                   | No                     | ns      |
| Rapamycin vs PD168393                         | -117.2                   | Yes                    | ***     |
| Rapamycin vs PD168393+Rapamycin               | 33.37                    | No                     | ns      |
| $\Delta$ Np63 MO vs $\Delta$ Np63+Rapamycin   | 126.3                    | Yes                    | ***     |
| $\Delta$ Np63 MO vs PD168393                  | 39.34                    | No                     | ns      |
| $\Delta$ Np63 MO vs PD168393+Rapamycin        | 189.9                    | Yes                    | ***     |
| $\Delta$ Np63+Rapamycin vs PD168393           | -86.93                   | Yes                    | *       |
| $\Delta$ Np63+Rapamycin vs PD168393+Rapamycin | 63.61                    | No                     | ns      |
| PD168393 vs PD168393+Rapamycin                | 150.5                    | Yes                    | ***     |

**Table S4.** Statistical comparison for cell surface area as shown in Figure 5B.

| Table Analyzed                         | Total surface area     |                        |         |
|----------------------------------------|------------------------|------------------------|---------|
| Kruskal-Wallis test                    |                        |                        |         |
| P value                                | < 0.0001               |                        |         |
| Exact or approximate P value?          | Gaussian Approximation |                        |         |
| P value summary                        | ***                    |                        |         |
| Do the medians vary signif. (P < 0.05) | Yes                    |                        |         |
| Number of groups                       | 4                      |                        |         |
| Kruskal-Wallis statistic               | 48.36                  |                        |         |
|                                        |                        |                        |         |
| Dunn's Multiple Comparison Test        | Difference in rank sum | Significant? P < 0.05? | Summary |
| DMSO (Control) vs CompC                | -91.6                  | Yes                    | ***     |
| DMSO (Control) vs ExonD                | -15                    | No                     | ns      |
| DMSO (Control) vs ExonD + CompC        | -41.27                 | Yes                    | *       |
| CompC vs ExonD                         | 76.6                   | Yes                    | ***     |
| CompC vs ExonD + CompC                 | 50.33                  | Yes                    | **      |
| ExonD vs ExonD + CompC                 | -26.27                 | No                     | ns      |

| Table Analyzed                         | Apical Surface Area    |                        |         |
|----------------------------------------|------------------------|------------------------|---------|
| Kruskal-Wallis test                    |                        |                        |         |
| P value                                | < 0.0001               |                        |         |
| Exact or approximate P value?          | Gaussian Approximation |                        |         |
| P value summary                        | ***                    |                        |         |
| Do the medians vary signif. (P < 0.05) | Yes                    |                        |         |
| Number of groups                       | 4                      |                        |         |
| Kruskal-Wallis statistic               | 49.52                  |                        |         |
|                                        |                        |                        |         |
| Dunn's Multiple Comparison Test        | Difference in rank sum | Significant? P < 0.05? | Summary |
| DMSO (Control) vs CompC                | -79.28                 | Yes                    | ***     |
| DMSO (Control) vs ExonD                | 11.99                  | No                     | ns      |
| DMSO (Control) vs ExonD + CompC        | -14.39                 | No                     | ns      |
| CompC vs ExonD                         | 91.27                  | Yes                    | ***     |
| CompC vs ExonD + CompC                 | 64.89                  | Yes                    | ***     |
| ExonD vs ExonD + CompC                 | -26.37                 | No                     | ns      |

|                                        |                          |                        |         |
|----------------------------------------|--------------------------|------------------------|---------|
| Table Analyzed                         | Basolateral Surface Area |                        |         |
| Kruskal-Wallis test                    |                          |                        |         |
| P value                                | < 0.0001                 |                        |         |
| Exact or approximate P value?          | Gaussian Approximation   |                        |         |
| P value summary                        | ***                      |                        |         |
| Do the medians vary signif. (P < 0.05) | Yes                      |                        |         |
| Number of groups                       | 4                        |                        |         |
| Kruskal-Wallis statistic               | 82.88                    |                        |         |
|                                        |                          |                        |         |
| Dunn's Multiple Comparison Test        | Difference in rank sum   | Significant? P < 0.05? | Summary |
| DMSO (Control) vs CompC                | -85.61                   | Yes                    | ***     |
| DMSO (Control) vs ExonD + DMSO         | -98.37                   | Yes                    | ***     |
| DMSO (Control) vs ExonD + CompC        | -119.6                   | Yes                    | ***     |
| CompC vs ExonD + DMSO                  | -12.75                   | No                     | ns      |
| CompC vs ExonD + CompC                 | -33.96                   | No                     | ns      |
| ExonD + DMSO vs ExonD + CompC          | -21.21                   | No                     | ns      |

|                                        |                        |                        |         |
|----------------------------------------|------------------------|------------------------|---------|
| Table Analyzed                         | Height                 |                        |         |
| Kruskal-Wallis test                    |                        |                        |         |
| P value                                | < 0.0001               |                        |         |
| Exact or approximate P value?          | Gaussian Approximation |                        |         |
| P value summary                        | ***                    |                        |         |
| Do the medians vary signif. (P < 0.05) | Yes                    |                        |         |
| Number of groups                       | 4                      |                        |         |
| Kruskal-Wallis statistic               | 119.5                  |                        |         |
|                                        |                        |                        |         |
| Dunn's Multiple Comparison Test        | Difference in rank sum | Significant? P < 0.05? | Summary |
| DMSO (Control) vs Compound C           | -23.24                 | No                     | ns      |
| DMSO (Control) vs Exon D               | -112.5                 | Yes                    | ***     |
| DMSO (Control) vs Exon D + Compound C  | -125.5                 | Yes                    | ***     |
| Compound C vs Exon D                   | -89.25                 | Yes                    | ***     |
| Compound C vs Exon D + Compound C      | -102.3                 | Yes                    | ***     |
| Exon D vs Exon D + Compound C          | -13.03                 | No                     | ns      |

**Table S5.** Statistical comparison for cell surface area and TGN surface area and volume as shown in Figure 6.

(A) Statistical analysis for cell surface area quantification in Figure 6B.

| Table Analyzed                            | Total cell surface area |
|-------------------------------------------|-------------------------|
| Column A                                  | DMSO                    |
| vs                                        | vs                      |
| Column B                                  | Rapamycin               |
|                                           |                         |
| Mann Whitney test                         |                         |
| P value                                   | 0.1302                  |
| Exact or approximate P value?             | Gaussian Approximation  |
| P value summary                           | ns                      |
| Are medians signif. different? (P < 0.05) | No                      |
| One- or two-tailed P value?               | Two-tailed              |
| Sum of ranks in column A,B                | 4727 , 5858             |
| Mann-Whitney U                            | 2242                    |

| Table Analyzed                            | Apical Surface Area    |
|-------------------------------------------|------------------------|
| Column A                                  | WT                     |
| vs                                        | vs                     |
| Column B                                  | Rapamycin              |
|                                           |                        |
| Mann Whitney test                         |                        |
| P value                                   | 0.1078                 |
| Exact or approximate P value?             | Gaussian Approximation |
| P value summary                           | ns                     |
| Are medians signif. different? (P < 0.05) | No                     |
| One- or two-tailed P value?               | Two-tailed             |
| Sum of ranks in column A,B                | 4703 , 5882            |
| Mann-Whitney U                            | 2218                   |

| Table Analyzed                            | Basolateral Surface Area |
|-------------------------------------------|--------------------------|
| Column A                                  | WT                       |
| vs                                        | vs                       |
| Column B                                  | Rapa                     |
|                                           |                          |
| Mann Whitney test                         |                          |
| P value                                   | 0.3597                   |
| Exact or approximate P value?             | Gaussian Approximation   |
| P value summary                           | ns                       |
| Are medians signif. different? (P < 0.05) | No                       |
| One- or two-tailed P value?               | Two-tailed               |
| Sum of ranks in column A,B                | 4878 , 5707              |
| Mann-Whitney U                            | 2393                     |



## (B) Statistical analysis for TGN surface area and volume quantification in Figure 6C.

| Table Analyzed                            | TGN Surface Area       |
|-------------------------------------------|------------------------|
| Column A                                  | DMSO                   |
| vs                                        | vs                     |
| Column B                                  | Rapamycin              |
|                                           |                        |
| Mann Whitney test                         |                        |
| P value                                   | < 0.0001               |
| Exact or approximate P value?             | Gaussian Approximation |
| P value summary                           | ***                    |
| Are medians signif. different? (P < 0.05) | Yes                    |
| One- or two-tailed P value?               | Two-tailed             |
| Sum of ranks in column A,B                | 7207 , 4118            |
| Mann-Whitney U                            | 1268                   |

| Table Analyzed                            | TGN Volume             |
|-------------------------------------------|------------------------|
| Column A                                  | DMSO                   |
| vs                                        | vs                     |
| Column B                                  | Rapamycin              |
|                                           |                        |
| Mann Whitney test                         |                        |
| P value                                   | < 0.0001               |
| Exact or approximate P value?             | Gaussian Approximation |
| P value summary                           | ***                    |
| Are medians signif. different? (P < 0.05) | Yes                    |
| One- or two-tailed P value?               | Two-tailed             |
| Sum of ranks in column A,B                | 7144 , 4181            |
| Mann-Whitney U                            | 1331                   |

## (C) Statistical analysis for TGN surface area and volume quantification in Figure 6E.

| Table Analyzed                         | TGN Surface area       |                        |         |
|----------------------------------------|------------------------|------------------------|---------|
| Kruskal-Wallis test                    |                        |                        |         |
| P value                                | < 0.0001               |                        |         |
| Exact or approximate P value?          | Gaussian Approximation |                        |         |
| P value summary                        | ***                    |                        |         |
| Do the medians vary signif. (P < 0.05) | Yes                    |                        |         |
| Number of groups                       | 4                      |                        |         |
| Kruskal-Wallis statistic               | 84.49                  |                        |         |
|                                        |                        |                        |         |
| Dunn's Multiple Comparison Test        | Difference in rank sum | Significant? P < 0.05? | Summary |
| DMSO vs PD168393                       | -87.6                  | Yes                    | ***     |
| DMSO vs WT                             | -12.65                 | No                     | ns      |
| DMSO vs $\Delta$ Np63 MO               | -106.4                 | Yes                    | ***     |
| PD168393 vs WT                         | 74.95                  | Yes                    | ***     |
| PD168393 vs $\Delta$ Np63 MO           | -18.79                 | No                     | ns      |
| WT vs $\Delta$ Np63 MO                 | -93.73                 | Yes                    | ***     |

| Table Analyzed                         | TGN Volume             |                        |         |
|----------------------------------------|------------------------|------------------------|---------|
| Kruskal-Wallis test                    |                        |                        |         |
| P value                                | < 0.0001               |                        |         |
| Exact or approximate P value?          | Gaussian Approximation |                        |         |
| P value summary                        | ***                    |                        |         |
| Do the medians vary signif. (P < 0.05) | Yes                    |                        |         |
| Number of groups                       | 4                      |                        |         |
| Kruskal-Wallis statistic               | 67.44                  |                        |         |
|                                        |                        |                        |         |
| Dunn's Multiple Comparison Test        | Difference in rank sum | Significant? P < 0.05? | Summary |
| DMSO vs PD168393                       | -78.89                 | Yes                    | ***     |
| DMSO vs WT                             | -24.88                 | No                     | ns      |
| DMSO vs $\Delta$ Np63 MO               | -103                   | Yes                    | ***     |
| PD168393 vs WT                         | 54.01                  | Yes                    | ***     |
| PD168393 vs $\Delta$ Np63 MO           | -24.13                 | No                     | ns      |
| WT vs $\Delta$ Np63 MO                 | -78.15                 | Yes                    | ***     |

## (D) Statistical analysis for TGN surface area and volume quantification in Figure 6G

| Table Analyzed                                | TGN Surface Area       |                        |         |
|-----------------------------------------------|------------------------|------------------------|---------|
| Kruskal-Wallis test                           |                        |                        |         |
| P value                                       | < 0.0001               |                        |         |
| Exact or approximate P value?                 | Gaussian Approximation |                        |         |
| P value summary                               | ***                    |                        |         |
| Do the medians vary signif. (P < 0.05)        | Yes                    |                        |         |
| Number of groups                              | 6                      |                        |         |
| Kruskal-Wallis statistic                      | 170.7                  |                        |         |
|                                               |                        |                        |         |
| Dunn's Multiple Comparison Test               | Difference in rank sum | Significant? P < 0.05? | Summary |
| DMSO vs Rapa                                  | 55.64                  | No                     | ns      |
| DMSO vs $\Delta$ Np63 MO                      | -170.4                 | Yes                    | ***     |
| DMSO vs $\Delta$ Np63+Rapamycin               | -52.68                 | No                     | ns      |
| DMSO vs PD168393                              | -108.6                 | Yes                    | ***     |
| DMSO vs PD168393+Rapamycin                    | 36                     | No                     | ns      |
| Rapa vs $\Delta$ Np63 MO                      | -226.1                 | Yes                    | ***     |
| Rapa vs $\Delta$ Np63+Rapamycin               | -108.3                 | Yes                    | ***     |
| Rapa vs PD168393                              | -164.3                 | Yes                    | ***     |
| Rapa vs PD168393+Rapamycin                    | -19.64                 | No                     | ns      |
| $\Delta$ Np63 MO vs $\Delta$ Np63+Rapamycin   | 117.7                  | Yes                    | ***     |
| $\Delta$ Np63 MO vs PD168393                  | 61.79                  | No                     | ns      |
| $\Delta$ Np63 MO vs PD168393+Rapamycin        | 206.4                  | Yes                    | ***     |
| $\Delta$ Np63+Rapamycin vs PD168393           | -55.96                 | No                     | ns      |
| $\Delta$ Np63+Rapamycin vs PD168393+Rapamycin | 88.68                  | Yes                    | ***     |
| PD168393 vs PD168393+Rapamycin                | 144.6                  | Yes                    | ***     |

|                                               |                        |                        |         |
|-----------------------------------------------|------------------------|------------------------|---------|
| Table Analyzed                                | TGN Volume             |                        |         |
| Kruskal-Wallis test                           |                        |                        |         |
| P value                                       | < 0.0001               |                        |         |
| Exact or approximate P value?                 | Gaussian Approximation |                        |         |
| P value summary                               | ***                    |                        |         |
| Do the medians vary signif. (P < 0.05)        | Yes                    |                        |         |
| Number of groups                              | 6                      |                        |         |
| Kruskal-Wallis statistic                      | 154.6                  |                        |         |
|                                               |                        |                        |         |
| Dunn's Multiple Comparison Test               | Difference in rank sum | Significant? P < 0.05? | Summary |
| DMSO vs Rapa                                  | 82.75                  | Yes                    | ***     |
| DMSO vs $\Delta$ Np63 MO                      | -176.6                 | Yes                    | ***     |
| DMSO vs $\Delta$ Np63+Rapamycin               | -63.29                 | No                     | ns      |
| DMSO vs PD168393                              | -102.4                 | Yes                    | ***     |
| DMSO vs PD168393+Rapamycin                    | 63.69                  | No                     | ns      |
| Rapa vs $\Delta$ Np63 MO                      | -259.3                 | Yes                    | ***     |
| Rapa vs $\Delta$ Np63+Rapamycin               | -146                   | Yes                    | ***     |
| Rapa vs PD168393                              | -185.2                 | Yes                    | ***     |
| Rapa vs PD168393+Rapamycin                    | -19.05                 | No                     | ns      |
| $\Delta$ Np63 MO vs $\Delta$ Np63+Rapamycin   | 113.3                  | Yes                    | ***     |
| $\Delta$ Np63 MO vs PD168393                  | 74.16                  | No                     | ns      |
| $\Delta$ Np63 MO vs PD168393+Rapamycin        | 240.3                  | Yes                    | ***     |
| $\Delta$ Np63+Rapamycin vs PD168393           | -39.12                 | No                     | ns      |
| $\Delta$ Np63+Rapamycin vs PD168393+Rapamycin | 127                    | Yes                    | ***     |
| PD168393 vs PD168393+Rapamycin                | 166.1                  | Yes                    | ***     |

**Table S6.** Statistical comparison for cell surface area and TGN surface area as well as volume as shown in Figure 7.

(A) Statistical analysis for TGN surface area and volume quantification in Figure 7B.

| Table Analyzed                         | TGN Surface Area       |                        |         |
|----------------------------------------|------------------------|------------------------|---------|
| Kruskal-Wallis test                    |                        |                        |         |
| P value                                | < 0.0001               |                        |         |
| Exact or approximate P value?          | Gaussian Approximation |                        |         |
| P value summary                        | ***                    |                        |         |
| Do the medians vary signif. (P < 0.05) | Yes                    |                        |         |
| Number of groups                       | 4                      |                        |         |
| Kruskal-Wallis statistic               | 166                    |                        |         |
|                                        |                        |                        |         |
| Dunn's Multiple Comparison Test        | Difference in rank sum | Significant? P < 0.05? | Summary |
| DMSO (Control) vs Rapa                 | 67.73                  | Yes                    | ***     |
| DMSO (Control) vs ExonD                | -111.3                 | Yes                    | ***     |
| DMSO (Control) vs ExonD+Rapa           | -34.79                 | No                     | ns      |
| Rapa vs ExonD                          | -179.1                 | Yes                    | ***     |
| Rapa vs ExonD+Rapa                     | -102.5                 | Yes                    | ***     |
| ExonD vs ExonD+Rapa                    | 76.53                  | Yes                    | ***     |

| Table Analyzed                         | TGN Volume             |                        |         |
|----------------------------------------|------------------------|------------------------|---------|
| Kruskal-Wallis test                    |                        |                        |         |
| P value                                | < 0.0001               |                        |         |
| Exact or approximate P value?          | Gaussian Approximation |                        |         |
| P value summary                        | ***                    |                        |         |
| Do the medians vary signif. (P < 0.05) | Yes                    |                        |         |
| Number of groups                       | 4                      |                        |         |
| Kruskal-Wallis statistic               | 144.2                  |                        |         |
|                                        |                        |                        |         |
| Dunn's Multiple Comparison Test        | Difference in rank sum | Significant? P < 0.05? | Summary |
| DMSO (Control) vs Rapa                 | 58.32                  | Yes                    | ***     |
| DMSO (Control) vs Exon D               | -108.3                 | Yes                    | ***     |
| DMSO (Control) vs Exon D +Rapa         | -31.95                 | No                     | ns      |
| Rapa vs Exon D                         | -166.6                 | Yes                    | ***     |
| Rapa vs Exon D +Rapa                   | -90.27                 | Yes                    | ***     |
| Exon D vs Exon D +Rapa                 | 76.32                  | Yes                    | ***     |

## (B) Statistical analysis for cell surface area quantification in Figure 7D.

|                                        |                        |                        |         |
|----------------------------------------|------------------------|------------------------|---------|
| Table Analyzed                         | Total surface area     |                        |         |
| Kruskal-Wallis test                    |                        |                        |         |
| P value                                | < 0.0001               |                        |         |
| Exact or approximate P value?          | Gaussian Approximation |                        |         |
| P value summary                        | ***                    |                        |         |
| Do the medians vary signif. (P < 0.05) | Yes                    |                        |         |
| Number of groups                       | 4                      |                        |         |
| Kruskal-Wallis statistic               | 29.37                  |                        |         |
|                                        |                        |                        |         |
| Dunn's Multiple Comparison Test        | Difference in rank sum | Significant? P < 0.05? | Summary |
| DMSO (Control) vs ExonD                | -33.15                 | No                     | ns      |
| DMSO (Control) vs Rapa                 | 14.15                  | No                     | ns      |
| DMSO (Control) vs ExonD+Rapa           | 42.23                  | Yes                    | *       |
| ExonD vs Rapa                          | 47.29                  | Yes                    | **      |
| ExonD vs ExonD+Rapa                    | 75.37                  | Yes                    | ***     |
| Rapa vs ExonD+Rapa                     | 28.08                  | No                     | ns      |

|                                        |                        |                        |         |
|----------------------------------------|------------------------|------------------------|---------|
| Table Analyzed                         | Apical surface area    |                        |         |
| Kruskal-Wallis test                    |                        |                        |         |
| P value                                | 0.0016                 |                        |         |
| Exact or approximate P value?          | Gaussian Approximation |                        |         |
| P value summary                        | **                     |                        |         |
| Do the medians vary signif. (P < 0.05) | Yes                    |                        |         |
| Number of groups                       | 4                      |                        |         |
| Kruskal-Wallis statistic               | 15.32                  |                        |         |
|                                        |                        |                        |         |
| Dunn's Multiple Comparison Test        | Difference in rank sum | Significant? P < 0.05? | Summary |
| DMSO (Control) vs ExonD                | 9.587                  | No                     | ns      |
| DMSO (Control) vs Rapa                 | 23.93                  | No                     | ns      |
| DMSO (Control) vs ExonD+Rapa           | 51.95                  | Yes                    | **      |
| ExonD vs Rapa                          | 14.35                  | No                     | ns      |
| ExonD vs ExonD+Rapa                    | 42.36                  | Yes                    | *       |
| Rapa vs ExonD+Rapa                     | 28.01                  | No                     | ns      |

|                                        |                          |                        |         |
|----------------------------------------|--------------------------|------------------------|---------|
| Table Analyzed                         | Basolateral surface area |                        |         |
| Kruskal-Wallis test                    |                          |                        |         |
| P value                                | < 0.0001                 |                        |         |
| Exact or approximate P value?          | Gaussian Approximation   |                        |         |
| P value summary                        | ***                      |                        |         |
| Do the medians vary signif. (P < 0.05) | Yes                      |                        |         |
| Number of groups                       | 4                        |                        |         |
| Kruskal-Wallis statistic               | 110                      |                        |         |
|                                        |                          |                        |         |
| Dunn's Multiple Comparison Test        | Difference in rank sum   | Significant? P < 0.05? | Summary |
| DMSO (Control) vs ExonD                | -130.6                   | Yes                    | ***     |
| DMSO (Control) vs Rapa                 | -21.29                   | No                     | ns      |
| DMSO (Control) vs ExonD+Rapa           | -10.44                   | No                     | ns      |
| ExonD vs Rapa                          | 109.3                    | Yes                    | ***     |
| ExonD vs ExonD+Rapa                    | 120.2                    | Yes                    | ***     |
| Rapa vs ExonD+Rapa                     | 10.85                    | No                     | ns      |

|                                        |                        |                        |         |
|----------------------------------------|------------------------|------------------------|---------|
| Table Analyzed                         | Height                 |                        |         |
| Kruskal-Wallis test                    |                        |                        |         |
| P value                                | < 0.0001               |                        |         |
| Exact or approximate P value?          | Gaussian Approximation |                        |         |
| P value summary                        | ***                    |                        |         |
| Do the medians vary signif. (P < 0.05) | Yes                    |                        |         |
| Number of groups                       | 4                      |                        |         |
| Kruskal-Wallis statistic               | 90.92                  |                        |         |
|                                        |                        |                        |         |
| Dunn's Multiple Comparison Test        | Difference in rank sum | Significant? P < 0.05? | Summary |
| DMSO (Control) vs Exon D MO            | -118.4                 | Yes                    | ***     |
| DMSO (Control) vs Rapa                 | -6.173                 | No                     | ns      |
| DMSO (Control) vs Exon D MO+Rapa       | -51.53                 | Yes                    | **      |
| Exon D MO vs Rapa                      | 112.2                  | Yes                    | ***     |
| Exon D MO vs Exon D MO+Rapa            | 66.88                  | Yes                    | ***     |
| Rapa vs Exon D MO+Rapa                 | -45.35                 | Yes                    | **      |

## (C) Statistical analysis for TGN surface area and volume quantification in Figure 7F.

| Table Analyzed                                 | TGN Surface Area       |                        |         |
|------------------------------------------------|------------------------|------------------------|---------|
| Kruskal-Wallis test                            |                        |                        |         |
| P value                                        | < 0.0001               |                        |         |
| Exact or approximate P value?                  | Gaussian Approximation |                        |         |
| P value summary                                | ***                    |                        |         |
| Do the medians vary signif. (P < 0.05)         | Yes                    |                        |         |
| Number of groups                               | 7                      |                        |         |
| Kruskal-Wallis statistic                       | 151.8                  |                        |         |
|                                                |                        |                        |         |
| Dunn's Multiple Comparison Test                | Difference in rank sum | Significant? P < 0.05? | Summary |
| DMSO (Control) vs PD 168393                    | -143.5                 | Yes                    | ***     |
| DMSO (Control) vs Exon D MO                    | -180.3                 | Yes                    | ***     |
| DMSO (Control) vs PD 168393+Exon D MO          | -125.1                 | Yes                    | ***     |
| DMSO (Control) vs WT                           | 64.56                  | No                     | ns      |
| DMSO (Control) vs $\Delta$ Np63 MO             | -120                   | Yes                    | ***     |
| DMSO (Control) vs $\Delta$ Np63+Exon D MO      | -2.333                 | No                     | ns      |
| PD 168393 vs Exon D MO                         | -36.8                  | No                     | ns      |
| PD 168393 vs PD 168393+Exon D MO               | 18.37                  | No                     | ns      |
| PD 168393 vs WT                                | 208.1                  | Yes                    | ***     |
| PD 168393 vs $\Delta$ Np63 MO                  | 23.48                  | No                     | ns      |
| PD 168393 vs $\Delta$ Np63+Exon D MO           | 141.2                  | Yes                    | ***     |
| Exon D MO vs PD 168393+Exon D MO               | 55.17                  | No                     | ns      |
| Exon D MO vs WT                                | 244.9                  | Yes                    | ***     |
| Exon D MO vs $\Delta$ Np63 MO                  | 60.28                  | No                     | ns      |
| Exon D MO vs $\Delta$ Np63+Exon D MO           | 178                    | Yes                    | ***     |
| PD 168393+Exon D MO vs WT                      | 189.7                  | Yes                    | ***     |
| PD 168393+Exon D MO vs $\Delta$ Np63 MO        | 5.107                  | No                     | ns      |
| PD 168393+Exon D MO vs $\Delta$ Np63+Exon D MO | 122.8                  | Yes                    | ***     |
| WT vs $\Delta$ Np63 MO                         | -184.6                 | Yes                    | ***     |
| WT vs $\Delta$ Np63+Exon D MO                  | -66.89                 | No                     | ns      |
| $\Delta$ Np63 MO vs $\Delta$ Np63+Exon D MO    | 117.7                  | Yes                    | ***     |



|                                                |                        |                        |         |
|------------------------------------------------|------------------------|------------------------|---------|
| Table Analyzed                                 | TGN Volume             |                        |         |
| Kruskal-Wallis test                            |                        |                        |         |
| P value                                        | < 0.0001               |                        |         |
| Exact or approximate P value?                  | Gaussian Approximation |                        |         |
| P value summary                                | ***                    |                        |         |
| Do the medians vary signif. (P < 0.05)         | Yes                    |                        |         |
| Number of groups                               | 7                      |                        |         |
| Kruskal-Wallis statistic                       | 136.1                  |                        |         |
| Dunn's Multiple Comparison Test                | Difference in rank sum | Significant? P < 0.05? | Summary |
| DMSO (Control) vs PD 168393                    | -113.3                 | Yes                    | **      |
| DMSO (Control) vs Exon D MO                    | -137.5                 | Yes                    | ***     |
| DMSO (Control) vs PD 168393+Exon D MO          | -114.2                 | Yes                    | ***     |
| DMSO (Control) vs WT                           | 78.72                  | No                     | ns      |
| DMSO (Control) vs $\Delta$ Np63 MO             | -63.03                 | No                     | ns      |
| DMSO (Control) vs $\Delta$ Np63+Exon D MO      | 57.28                  | No                     | ns      |
| PD 168393 vs Exon D MO                         | -24.22                 | No                     | ns      |
| PD 168393 vs PD 168393+Exon D MO               | -0.9333                | No                     | ns      |
| PD 168393 vs WT                                | 192                    | Yes                    | ***     |
| PD 168393 vs $\Delta$ Np63 MO                  | 50.28                  | No                     | ns      |
| PD 168393 vs $\Delta$ Np63+Exon D MO           | 170.6                  | Yes                    | ***     |
| Exon D MO vs PD 168393+Exon D MO               | 23.29                  | No                     | ns      |
| Exon D MO vs WT                                | 216.3                  | Yes                    | ***     |
| Exon D MO vs $\Delta$ Np63 MO                  | 74.5                   | Yes                    | *       |
| Exon D MO vs $\Delta$ Np63+Exon D MO           | 194.8                  | Yes                    | ***     |
| PD 168393+Exon D MO vs WT                      | 193                    | Yes                    | ***     |
| PD 168393+Exon D MO vs $\Delta$ Np63 MO        | 51.21                  | No                     | ns      |
| PD 168393+Exon D MO vs $\Delta$ Np63+Exon D MO | 171.5                  | Yes                    | ***     |
| WT vs $\Delta$ Np63 MO                         | -141.7                 | Yes                    | ***     |
| WT vs $\Delta$ Np63+Exon D MO                  | -21.44                 | No                     | ns      |
| $\Delta$ Np63 MO vs $\Delta$ Np63+Exon D MO    | 120.3                  | Yes                    | ***     |

**Table S7.** Statistical analysis for the quantification of number of Rab11 vesicles as shown in Supplementary Figure 2D.

|                                              |                          |                        |         |
|----------------------------------------------|--------------------------|------------------------|---------|
| Table Analyzed                               | Number of Rab11 vesicles |                        |         |
| Kruskal-Wallis test                          |                          |                        |         |
| P value                                      | < 0.0001                 |                        |         |
| Exact or approximate P value?                | Gaussian Approximation   |                        |         |
| P value summary                              | ***                      |                        |         |
| Do the medians vary signif. (P < 0.05)       | Yes                      |                        |         |
| Number of groups                             | 4                        |                        |         |
| Kruskal-Wallis statistic                     | 28.75                    |                        |         |
|                                              |                          |                        |         |
| Dunn's Multiple Comparison Test              | Difference in rank sum   | Significant? P < 0.05? | Summary |
| WT vs Myosin Vb MO                           | -22.90                   | Yes                    | ***     |
| WT vs Myosin Vb-Rab10+/11-                   | -23.65                   | Yes                    | ***     |
| WT vs Myosin Vb-Rab10-/11+                   | -9.050                   | No                     | ns      |
| Myosin Vb MO vs Myosin Vb-Rab10+/11-         | -0.7500                  | No                     | ns      |
| Myosin Vb MO vs Myosin Vb-Rab10-/11+         | 13.85                    | Yes                    | *       |
| Myosin Vb-Rab10+/11- vs Myosin Vb-Rab10-/11+ | 14.60                    | Yes                    | *       |

**Table S8.** Statistical analysis for the TGN surface area and volume between Myosin Vb isoform injected clones and non-clones in the Exon D morphants as shown in Supplementary Figure 3D.

|                                                                         |                        |                        |         |
|-------------------------------------------------------------------------|------------------------|------------------------|---------|
| Table Analyzed                                                          | TGN Volume             |                        |         |
| Kruskal-Wallis test                                                     |                        |                        |         |
| P value                                                                 | < 0.0001               |                        |         |
| Exact or approximate P value?                                           | Gaussian Approximation |                        |         |
| P value summary                                                         | ***                    |                        |         |
| Do the medians vary signif. (P < 0.05)                                  | Yes                    |                        |         |
| Number of groups                                                        | 5                      |                        |         |
| Kruskal-Wallis statistic                                                | 52.55                  |                        |         |
|                                                                         |                        |                        |         |
| Dunn's Multiple Comparison Test                                         | Difference in rank sum | Significant? P < 0.05? | Summary |
| Uninjected Wildtype vs MyoVbRab10 <sup>+/11+</sup> Non-clones           | -107.0                 | Yes                    | ***     |
| Uninjected Wildtype vs MyoVbRab10 <sup>+/11+</sup> Clones               | -21.21                 | No                     | ns      |
| Uninjected Wildtype vs MyoVbRab10 <sup>-/11+</sup> Non-clones           | -66.77                 | Yes                    | **      |
| Uninjected Wildtype vs MyoVbRab10 <sup>-/11+</sup> Clones               | -76.45                 | Yes                    | ***     |
| MyoVbRab10 <sup>+/11+</sup> Non-clones vs MyoVbRab10 <sup>+/11+</sup>   | 85.81                  | Yes                    | ***     |
| MyoVbRab10 <sup>+/11+</sup> Non-clones vs MyoVbRab10 <sup>/11</sup>     | 40.25                  | No                     | ns      |
| MyoVbRab10 <sup>+/11+</sup> Non-clones vs MyoVbRab10 <sup>/11+</sup>    | 30.57                  | No                     | ns      |
| MyoVbRab10 <sup>+/11+</sup> Clones vs MyoVbRab10 <sup>/11+</sup>        | -45.56                 | No                     | ns      |
| MyoVbRab10 <sup>+/11+</sup> Clones vs MyoVbRab10 <sup>/11+</sup> Clones | -55.24                 | Yes                    | *       |
| MyoVbRab10 <sup>/11+</sup> Non-clones vs MyoVbRab10 <sup>/11+</sup>     | -9.683                 | No                     | ns      |

|                                                                          |                        |                        |         |
|--------------------------------------------------------------------------|------------------------|------------------------|---------|
| Table Analyzed                                                           | TGN Surface area       |                        |         |
| Kruskal-Wallis test                                                      |                        |                        |         |
| P value                                                                  | < 0.0001               |                        |         |
| Exact or approximate P value?                                            | Gaussian Approximation |                        |         |
| P value summary                                                          | ***                    |                        |         |
| Do the medians vary signif. (P < 0.05)                                   | Yes                    |                        |         |
| Number of groups                                                         | 5                      |                        |         |
| Kruskal-Wallis statistic                                                 | 104.6                  |                        |         |
|                                                                          |                        |                        |         |
| Dunn's Multiple Comparison Test                                          | Difference in rank sum | Significant? P < 0.05? | Summary |
| Uninjected Wildtype vs MyoVbRab10 <sup>+/11+</sup> Non-clones            | -161.1                 | Yes                    | ***     |
| Uninjected Wildtype vs MyoVbRab10 <sup>+/11+</sup> Clones                | -59.99                 | Yes                    | **      |
| Uninjected Wildtype vs MyoVbRab10 <sup>-/11+</sup> Non-clones            | -102.8                 | Yes                    | ***     |
| Uninjected Wildtype vs MyoVbRab10 <sup>-/11+</sup> Clones                | -117.1                 | Yes                    | ***     |
| MyoVbRab10 <sup>+/11+</sup> Non-clones vs MyoVbRab10 <sup>+/11+</sup>    | 101.1                  | Yes                    | ***     |
| MyoVbRab10 <sup>+/11+</sup> Non-clones vs MyoVbRab10 <sup>-/11+</sup>    | 58.33                  | Yes                    | *       |
| MyoVbRab10 <sup>+/11+</sup> Non-clones vs MyoVbRab10 <sup>-/11+</sup>    | 43.98                  | No                     | ns      |
| MyoVbRab10 <sup>+/11+</sup> Clones vs MyoVbRab10 <sup>-/11+</sup>        | -42.79                 | No                     | ns      |
| MyoVbRab10 <sup>+/11+</sup> Clones vs MyoVbRab10 <sup>-/11+</sup> Clones | -57.14                 | Yes                    | *       |
| MyoVbRab10 <sup>-/11+</sup> Non-clones vs MyoVbRab10 <sup>-/11+</sup>    | -14.35                 | No                     | ns      |

**Table S9.** Statistical analysis for the number of WGA positive vesicles and their co-localization with LAMP1 at different developmental time points in the Exon D morphants vs controls as shown in Supplementary Figure 4D.

|                                         |                             |                        |         |
|-----------------------------------------|-----------------------------|------------------------|---------|
| Table Analyzed                          | Number of vesicles at 22hpf |                        |         |
| Kruskal-Wallis test                     |                             |                        |         |
| P value                                 | 0.1556                      |                        |         |
| Exact or approximate P value?           | Gaussian Approximation      |                        |         |
| P value summary                         | ns                          |                        |         |
| Do the medians vary signif. (P < 0.05)  | No                          |                        |         |
| Number of groups                        | 4                           |                        |         |
| Kruskal-Wallis statistic                | 5.231                       |                        |         |
|                                         |                             |                        |         |
| Dunn's Multiple Comparison Test         | Difference in rank sum      | Significant? P < 0.05? | Summary |
| Control MO WGA vs Control MO LAMP1-WGA  | 3.214                       | No                     | ns      |
| Control MO WGA vs ExonD WGA             | -8.692                      | No                     | ns      |
| Control MO WGA vs ExonD LAMP1-WGA       | -4.328                      | No                     | ns      |
| Control MO LAMP1-WGA vs ExonD WGA       | -11.91                      | No                     | ns      |
| Control MO LAMP1-WGA vs ExonD LAMP1-WGA | -7.542                      | No                     | ns      |
| ExonD WGA vs ExonD LAMP1-WGA            | 4.364                       | No                     | ns      |

|                                        |                             |                        |         |
|----------------------------------------|-----------------------------|------------------------|---------|
| Table Analyzed                         | Number of vesicles at 36hpf |                        |         |
| Kruskal-Wallis test                    |                             |                        |         |
| P value                                | < 0.0001                    |                        |         |
| Exact or approximate P value?          | Gaussian Approximation      |                        |         |
| P value summary                        | ***                         |                        |         |
| Do the medians vary signif. (P < 0.05) | Yes                         |                        |         |
| Number of groups                       | 4                           |                        |         |
| Kruskal-Wallis statistic               | 37.13                       |                        |         |
|                                        |                             |                        |         |
| Dunn's Multiple Comparison Test        | Difference in rank sum      | Significant? P < 0.05? | Summary |
| Control MO WGA vs Control LAMP1-WGA    | 0.0000                      | No                     | ns      |
| Control MO WGA vs Exon D WGA           | -26.35                      | Yes                    | ***     |
| Control MO WGA vs Exon D LAMP1-WGA     | -21.65                      | Yes                    | ***     |
| Control LAMP1-WGA vs Exon D WGA        | -26.35                      | Yes                    | ***     |
| Control LAMP1-WGA vs Exon D LAMP1      | -21.65                      | Yes                    | ***     |
| ExonD WGA vs Exon D LAMP1-WGA          | 4.692                       | No                     | ns      |

|                                        |                             |                        |         |
|----------------------------------------|-----------------------------|------------------------|---------|
| Table Analyzed                         | Number of vesicles at 72hpf |                        |         |
| Kruskal-Wallis test                    |                             |                        |         |
| P value                                | < 0.0001                    |                        |         |
| Exact or approximate P value?          | Gaussian Approximation      |                        |         |
| P value summary                        | ***                         |                        |         |
| Do the medians vary signif. (P < 0.05) | Yes                         |                        |         |
| Number of groups                       | 4                           |                        |         |
| Kruskal-Wallis statistic               | 34.79                       |                        |         |
|                                        |                             |                        |         |
| Dunn's Multiple Comparison Test        | Difference in rank sum      | Significant? P < 0.05? | Summary |
| Control WGA vs Control LAMP1-WGA       | -0.07143                    | No                     | ns      |
| Control WGA vs Exon D WGA              | -25.92                      | Yes                    | ***     |
| Control WGA vs Exon D LAMP1-WGA        | -23.32                      | Yes                    | ***     |
| Control LAMP1-WGA vs Exon D WGA        | -25.85                      | Yes                    | ***     |
| Control LAMP1-WGA vs Exon D LAMP1-WGA  | -23.25                      | Yes                    | ***     |
| ExonD WGA vs ExonD LAMP1-WGA           | 2.600                       | No                     | ns      |

**Table S10.** Statistical comparison for cell surface area as shown in Supplementary Figure 6D.

| Table Analyzed                            | Total Surface Area     |
|-------------------------------------------|------------------------|
| Column A                                  | DMSO                   |
| vs                                        | vs                     |
| Column B                                  | Compound C             |
|                                           |                        |
| Mann Whitney test                         |                        |
| P value                                   | < 0.0001               |
| Exact or approximate P value?             | Gaussian Approximation |
| P value summary                           | ***                    |
| Are medians signif. different? (P < 0.05) | Yes                    |
| One- or two-tailed P value?               | Two-tailed             |
| Sum of ranks in column A,B                | 3695 , 7630            |
| Mann-Whitney U                            | 845                    |

| Table Analyzed                            | Apical Surface Area    |
|-------------------------------------------|------------------------|
| Column A                                  | DMSO                   |
| vs                                        | vs                     |
| Column B                                  | Compound C             |
|                                           |                        |
| Mann Whitney test                         |                        |
| P value                                   | < 0.0001               |
| Exact or approximate P value?             | Gaussian Approximation |
| P value summary                           | ***                    |
| Are medians signif. different? (P < 0.05) | Yes                    |
| One- or two-tailed P value?               | Two-tailed             |
| Sum of ranks in column A,B                | 3895 , 7430            |
| Mann-Whitney U                            | 1045                   |

|                                           |                          |
|-------------------------------------------|--------------------------|
| Table Analyzed                            | Basolateral Surface Area |
| Column A                                  | DMSO                     |
| vs                                        | vs                       |
| Column B                                  | Compound C               |
|                                           |                          |
| Mann Whitney test                         |                          |
| P value                                   | < 0.0001                 |
| Exact or approximate P value?             | Gaussian Approximation   |
| P value summary                           | ***                      |
| Are medians signif. different? (P < 0.05) | Yes                      |
| One- or two-tailed P value?               | Two-tailed               |
| Sum of ranks in column A,B                | 3654 , 7671              |
| Mann-Whitney U                            | 804                      |

|                                           |                        |
|-------------------------------------------|------------------------|
| Table Analyzed                            | Cell height            |
| Column A                                  | DMSO                   |
| vs                                        | vs                     |
| Column B                                  | Compound C             |
|                                           |                        |
| Mann Whitney test                         |                        |
| P value                                   | < 0.0001               |
| Exact or approximate P value?             | Gaussian Approximation |
| P value summary                           | ***                    |
| Are medians signif. different? (P < 0.05) | Yes                    |
| One- or two-tailed P value?               | Two-tailed             |
| Sum of ranks in column A,B                | 4459 , 6866            |
| Mann-Whitney U                            | 1609                   |



**Table S11.** Statistical comparison for cell surface area, and TGN surface area and volume as shown in Supplementary Figure 7.

(A) Statistical analysis for cell surface area quantification in Supplementary Figure 7B.

| Table Analyzed                            | Total Surface Area     |
|-------------------------------------------|------------------------|
| Column A                                  | DMSO                   |
| vs                                        | vs                     |
| Column B                                  | Torin 1                |
|                                           |                        |
| Mann Whitney test                         |                        |
| P value                                   | < 0.0001               |
| Exact or approximate P value?             | Gaussian Approximation |
| P value summary                           | ***                    |
| Are medians signif. different? (P < 0.05) | Yes                    |
| One- or two-tailed P value?               | Two-tailed             |
| Sum of ranks in column A,B                | 7015 , 4310            |
| Mann-Whitney U                            | 1460                   |

| Table Analyzed                            | Apical Surface Area    |
|-------------------------------------------|------------------------|
| Column A                                  | DMSO                   |
| vs                                        | vs                     |
| Column B                                  | Torin 1                |
|                                           |                        |
| Mann Whitney test                         |                        |
| P value                                   | < 0.0001               |
| Exact or approximate P value?             | Gaussian Approximation |
| P value summary                           | ***                    |
| Are medians signif. different? (P < 0.05) | Yes                    |
| One- or two-tailed P value?               | Two-tailed             |
| Sum of ranks in column A,B                | 7101 , 4224            |
| Mann-Whitney U                            | 1374                   |

|                                           |                          |
|-------------------------------------------|--------------------------|
| Table Analyzed                            | Basolateral Surface Area |
| Column A                                  | DMSO                     |
| vs                                        | vs                       |
| Column B                                  | Torin 1                  |
|                                           |                          |
| Mann Whitney test                         |                          |
| P value                                   | 0.2757                   |
| Exact or approximate P value?             | Gaussian Approximation   |
| P value summary                           | ns                       |
| Are medians signif. different? (P < 0.05) | No                       |
| One- or two-tailed P value?               | Two-tailed               |
| Sum of ranks in column A,B                | 5953 , 5372              |
| Mann-Whitney U                            | 2522                     |

(B) Statistical analysis for TGN surface area and volume quantification in Supplementary Fig 7C

|                                           |                        |
|-------------------------------------------|------------------------|
| Table Analyzed                            | TGN Surface Area       |
| Column A                                  | DMSO                   |
| vs                                        | vs                     |
| Column B                                  | Torin 1                |
|                                           |                        |
| Mann Whitney test                         |                        |
| P value                                   | < 0.0001               |
| Exact or approximate P value?             | Gaussian Approximation |
| P value summary                           | ***                    |
| Are medians signif. different? (P < 0.05) | Yes                    |
| One- or two-tailed P value?               | Two-tailed             |
| Sum of ranks in column A,B                | 7570 , 3755            |
| Mann-Whitney U                            | 905                    |

|                                           |                        |
|-------------------------------------------|------------------------|
| Table Analyzed                            | TGN Volume             |
| Column A                                  | DMSO                   |
| vs                                        | vs                     |
| Column B                                  | Torin 1                |
|                                           |                        |
| Mann Whitney test                         |                        |
| P value                                   | < 0.0001               |
| Exact or approximate P value?             | Gaussian Approximation |
| P value summary                           | ***                    |
| Are medians signif. different? (P < 0.05) | Yes                    |
| One- or two-tailed P value?               | Two-tailed             |
| Sum of ranks in column A,B                | 7184 , 4141            |
| Mann-Whitney U                            | 1291                   |

## (C) Statistical analysis for TGN surface area and volume quantification in Supplementary Figure 7E

|                                           |                        |
|-------------------------------------------|------------------------|
| Table Analyzed                            | TGN Surface Area       |
| Column A                                  | DMSO                   |
| vs                                        | vs                     |
| Column B                                  | Compound C             |
|                                           |                        |
| Mann Whitney test                         |                        |
| P value                                   | < 0.0001               |
| Exact or approximate P value?             | Gaussian Approximation |
| P value summary                           | ***                    |
| Are medians signif. different? (P < 0.05) | Yes                    |
| One- or two-tailed P value?               | Two-tailed             |
| Sum of ranks in column A,B                | 3626 , 7699            |
| Mann-Whitney U                            | 776                    |

|                                           |                        |
|-------------------------------------------|------------------------|
| Table Analyzed                            | TGN Volume             |
| Column A                                  | DMSO                   |
| vs                                        | vs                     |
| Column B                                  | Compound C             |
|                                           |                        |
| Mann Whitney test                         |                        |
| P value                                   | < 0.0001               |
| Exact or approximate P value?             | Gaussian Approximation |
| P value summary                           | ***                    |
| Are medians signif. different? (P < 0.05) | Yes                    |
| One- or two-tailed P value?               | Two-tailed             |
| Sum of ranks in column A,B                | 3943 , 7382            |
| Mann-Whitney U                            | 1093                   |

## (D) Statistical analysis for TGN surface area and volume quantification in Supplementary Figure 7G

| Table Analyzed                                       | TGN Surface Area       |                        |         |
|------------------------------------------------------|------------------------|------------------------|---------|
| Kruskal-Wallis test                                  |                        |                        |         |
| P value                                              | < 0.0001               |                        |         |
| Exact or approximate P value?                        | Gaussian Approximation |                        |         |
| P value summary                                      | ***                    |                        |         |
| Do the medians vary signif. (P < 0.05)               | Yes                    |                        |         |
| Number of groups                                     | 6                      |                        |         |
| Kruskal-Wallis statistic                             | 142.8                  |                        |         |
|                                                      |                        |                        |         |
| Dunn's Multiple Comparison Test                      | Difference in rank sum | Significant? P < 0.05? | Summary |
| DMSO vs Cerulenin                                    | 73.93                  | Yes                    | **      |
| DMSO vs $\Delta$ Np63 MO                             | -161.4                 | Yes                    | ***     |
| DMSO vs $\Delta$ Np63 MO + Cerulenin                 | 33.53                  | No                     | ns      |
| DMSO vs PD168393                                     | -143.5                 | Yes                    | ***     |
| DMSO vs PD168393 + Cerulenin                         | 10.23                  | No                     | ns      |
| Cerulenin vs $\Delta$ Np63 MO                        | -235.3                 | Yes                    | ***     |
| Cerulenin vs $\Delta$ Np63 MO + Cerulenin            | -40.41                 | No                     | ns      |
| Cerulenin vs PD168393                                | -217.4                 | Yes                    | ***     |
| Cerulenin vs PD168393 + Cerulenin                    | -63.7                  | No                     | ns      |
| $\Delta$ Np63 MO vs $\Delta$ Np63 MO + Cerulenin     | 194.9                  | Yes                    | ***     |
| $\Delta$ Np63 MO vs PD168393                         | 17.88                  | No                     | ns      |
| $\Delta$ Np63 MO vs PD168393 + Cerulenin             | 171.6                  | Yes                    | ***     |
| $\Delta$ Np63 MO + Cerulenin vs PD168393             | -177                   | Yes                    | ***     |
| $\Delta$ Np63 MO + Cerulenin vs PD168393 + Cerulenin | -23.29                 | No                     | ns      |
| PD168393 vs PD168393 + Cerulenin                     | 153.7                  | Yes                    | ***     |

|                                                      |                        |                        |         |
|------------------------------------------------------|------------------------|------------------------|---------|
| Table Analyzed                                       | TGN Volume             |                        |         |
| Kruskal-Wallis test                                  |                        |                        |         |
| P value                                              | < 0.0001               |                        |         |
| Exact or approximate P value?                        | Gaussian Approximation |                        |         |
| P value summary                                      | ***                    |                        |         |
| Do the medians vary signif. (P < 0.05)               | Yes                    |                        |         |
| Number of groups                                     | 6                      |                        |         |
| Kruskal-Wallis statistic                             | 141.4                  |                        |         |
| Dunn's Multiple Comparison Test                      | Difference in rank sum | Significant? P < 0.05? | Summary |
| DMSO vs Cerulenin                                    | 97.23                  | Yes                    | ***     |
| DMSO vs $\Delta$ Np63 MO                             | -146.3                 | Yes                    | ***     |
| DMSO vs $\Delta$ Np63 MO + Cerulenin                 | 35.28                  | No                     | ns      |
| DMSO vs PD168393                                     | -111.6                 | Yes                    | ***     |
| DMSO vs PD168393 + Cerulenin                         | 52.33                  | No                     | ns      |
| Cerulenin vs $\Delta$ Np63 MO                        | -243.5                 | Yes                    | ***     |
| Cerulenin vs $\Delta$ Np63 MO + Cerulenin            | -61.95                 | No                     | ns      |
| Cerulenin vs PD168393                                | -208.9                 | Yes                    | ***     |
| Cerulenin vs PD168393 + Cerulenin                    | -44.89                 | No                     | ns      |
| $\Delta$ Np63 MO vs $\Delta$ Np63 MO + Cerulenin     | 181.5                  | Yes                    | ***     |
| $\Delta$ Np63 MO vs PD168393                         | 34.63                  | No                     | ns      |
| $\Delta$ Np63 MO vs PD168393 + Cerulenin             | 198.6                  | Yes                    | ***     |
| $\Delta$ Np63 MO + Cerulenin vs PD168393             | -146.9                 | Yes                    | ***     |
| $\Delta$ Np63 MO + Cerulenin vs PD168393 + Cerulenin | 17.05                  | No                     | ns      |
| PD168393 vs PD168393 + Cerulenin                     | 164                    | Yes                    | ***     |

**Table S12.** Statistical comparison for FASN intensity quantification, TGN volume and surface area, and cell surface area as shown in Supplementary Figure 8.

(A) Statistical analysis for FASN intensity quantification in Supplementary Figure 8B.

|                                              |                        |
|----------------------------------------------|------------------------|
| Table Analyzed                               | FASN Mean Intensity    |
| Column A                                     | Control MO             |
| vs                                           | vs                     |
| Column B                                     | Exon D MO              |
|                                              |                        |
| Mann Whitney test                            |                        |
| P value                                      | < 0.0001               |
| Exact or approximate P value?                | Gaussian Approximation |
| P value summary                              | ***                    |
| Are medians signif. different?<br>(P < 0.05) | Yes                    |
| One- or two-tailed P value?                  | Two-tailed             |
| Sum of ranks in column A,B                   | 1535 , 3515            |
| Mann-Whitney U                               | 260.0                  |

(B) Statistical comparison for TGN surface area and volume as shown in Supplementary Figure 8E.

|                                        |                        |                        |         |
|----------------------------------------|------------------------|------------------------|---------|
| Table Analyzed                         | TGN Surface Area       |                        |         |
|                                        |                        |                        |         |
| Kruskal-Wallis test                    |                        |                        |         |
| P value                                | < 0.0001               |                        |         |
| Exact or approximate P value?          | Gaussian Approximation |                        |         |
| P value summary                        | ***                    |                        |         |
| Do the medians vary signif. (P < 0.05) | Yes                    |                        |         |
| Number of groups                       | 4                      |                        |         |
| Kruskal-Wallis statistic               | 50.83                  |                        |         |
|                                        |                        |                        |         |
| Dunn's Multiple Comparison Test        | Difference in rank sum | Significant? P < 0.05? | Summary |
| DMSO vs CompC                          | -93.28                 | Yes                    | ***     |
| DMSO vs Exon D MO                      | -59.85                 | Yes                    | ***     |
| DMSO vs Exon D MO + Comp C             | -74.99                 | Yes                    | ***     |
| Comp C vs Exon D MO                    | 33.43                  | No                     | ns      |
| Comp C vs Exon D MO + Comp C           | 18.29                  | No                     | ns      |
| Exon D MO vs Exon D MO + Comp C        | -15.14                 | No                     | ns      |

|                                        |                        |                        |         |
|----------------------------------------|------------------------|------------------------|---------|
| Table Analyzed                         | TGN Volume             |                        |         |
|                                        |                        |                        |         |
| Kruskal-Wallis test                    |                        |                        |         |
| P value                                | < 0.0001               |                        |         |
| Exact or approximate P value?          | Gaussian Approximation |                        |         |
| P value summary                        | ***                    |                        |         |
| Do the medians vary signif. (P < 0.05) | Yes                    |                        |         |
| Number of groups                       | 4                      |                        |         |
| Kruskal-Wallis statistic               | 57.53                  |                        |         |
|                                        |                        |                        |         |
| Dunn's Multiple Comparison Test        | Difference in rank sum | Significant? P < 0.05? | Summary |
| DMSO vs Comp C                         | -102.7                 | Yes                    | ***     |
| DMSO vs Exon D                         | -63.84                 | Yes                    | ***     |
| DMSO vs Exon D + Comp C                | -78.55                 | Yes                    | ***     |
| CompC vs Exon D                        | 38.81                  | Yes                    | *       |
| Comp Cvs Exon D +Comp C                | 24.11                  | No                     | ns      |
| Exon D vs Exon D + CompC               | -14.71                 | No                     | ns      |

**Table S13. The compilation of the number of experimental sets, embryos and cells used for the phenotypic assessment and statistical evaluation in various experiments**

[Click here to download Table S13](#)
